# Supplementary material for: Cotton (Gossypium hirsutum) VIRMA as an N6-Methyladenosine RNA Methylation Regulator Participates in Controlling Chloroplast-Dependent and Independent Leaf Development
Source: MDPI journal article supplement (doi:10.3390/ijms23179887), 2022-08-31
Supplement: s1 [file s1]

Table S1 plant VIRMA amino acid sequences.

>AtVIR

MVRSEPCVLFAQTFVHPQLDEYVDEVIFAEPVITACEFLEQNASSSSQAVSLVGATSPPSFA  
 LEVFVRCEGESKFKRLCNPFlyTPSAPYPLEVEAVVTNHLVVRGSYRSLSLVYGNIVKDL  
 GQYNIILEGRSVTDIVSSTEGLNEDLPLVLHVSVRTIEECLSSLDIVSLPLAAVDLPVEVKRL  
 LQLLKIFDKLATNDVVKFVDTVVSGVSSYVTDNVDFFLKNKNCSAVTSSLDGLFHD  
 VDRVKEDILDNEIQESDVALGLFSFLESETYLATSQQLVVMLSPYIQFERDSLCTVLPKLS  
 KGKATLLGLSLAFLCSCGREGCLQFVNSGGMQDLVYLFHGDGQNSTITITLLLGVEQAT  
 RHVSGCEGFLGWWPREDGSIPSGKSEGYCLLLKLLMQKPCHEIASLAIYILRRLRIYEVISR  
 YEFAVLSALEGLSNHGAATHNLNMLSDAKSQLQKLQNLMKSLGSDPSPSAYAERSLV  
 SDHSEGWLSYKATSKLTSSWTCPFYSSGIDSHILALLKERGFLPLSAALLSMPELHSGVGD  
 MDVFTDIAMFIGNILSFMFSRTGLSFLHHPILTATIIQSLKGSVDLNKEECVPLHYASILIS  
 KGFTCSLLEIGINLEMHLRVVSAVDRLKLSIQQTEEFWILWELRDVSRSDCGREALTLGV  
 FPEALAVLIEALHSAKDMPEAVENSGISPLNLAICHSAAEIFEVIVSDSTASCLHAWIEHAPV  
 LHKALHTLSPGGSNRKDAPSRLKWDAGVYVYHKGHVGGLLRYAAVLASGGDAQLSSSSI  
 LALDLTPAENGAGESTNVSEMNVDNLGKVIFEKSFEGVNLSDSSISQLTTALRILALISDN  
 STVAAALYDEGAVTVVYAILVNCSFMFERSSNIYDYLVDHGGCSSISDFLSENRREQSLVD  
 LLIPSLVLLISVLQRLQGTKEQYRNTKLMKALLRLHREVSPKLAACAADLSSHYPDSALGF  
 GAVCHLIVSALVCWPVYGWIPGLFHTLLSGVQTSSVPALGPKETCSFLCILSDILPEEGVWF  
 WKSGLMPLLSGLRKLAVGTLMPGQKEKQINWYLEPGPLEKLINHLTPNLDKIAKIIQHHA  
 VLVVIQDMLRVFIVRIACQREHASILLRPIFSSIRDGILDQSSTRDTEAYMVYRYLNF  
 LEHPHAKGLLLEEGIVQLLVEVLERCYDATYPSENRVLEYGIVSASSVIQWCIPAFRSISLLC  
 DSQVPLLCFQKKELLASLSAKDCALIFFVLKFCQVLPVGNELLSCLGAFKDLSSCGEGQD  
 GLVSLFHLFSGTEESVSRWCDTNSLSLDQDMKNPPFLSCWIKLLNSINSKDGSLSLA  
 MKAVNVLSVGSIRLCLDGKSLDSKKVAALKSLFGLPSEFSGTDTFREENIGLIEQMVTLLSS  
 MTSGSDSSATAEMKPYLHEASQSLSLKDGNDIISCKGVFVSPGNLDMDDLVSRLNIED  
 DLYQRGLEDKFWWECPETLPERLPQSSLPKRKLPTLESSSRRAKGENSSVDIPTQNSIQ  
 GMGSVSLPPAPTRRDAFRQRKPNTSRPPSMHVDDYVARERSVDTAGNSNAITISRAGSSSG  
 RPPSIHVDEFMARQRERGQNPSTIVVGEAVVQVKNPTPARDEKVGKPKQFKADPDDDL  
 QGIDIVFDGEECEGPDDKLPFLQPDENLMQAPVMVEQNSPHSIVEETESDANGSSQFSHM  
 GTPVASNVDNAQSEFSSRISVSRPEMSLIREPSISSDRKFVEQADEAKKMAPLKSAGISES  
 GFIPAYHMPGSSGQNSIDPRVGPQGFYSKSGQOHTGHIHGGFSGRGVYEQKVMNPQPLPL  
 VPPPSVSPVIPHSSDLSNQSSPFISHGTQSSGGPTRLMPPLPSAIPQYSSNPYASLPQNTSTV  
 QSFGYNHAGVGTTEQQQSGPTIDHQSGLSVTGMTSYPPPNLMPSHNFSRPSLVPVPFYG  
 NPSHQGGDKPQTMLLVPSIPQSLNTQSIQPLPSMQLSQLQRPMPQPPQHVRPPIQISQPSQ  
 VSMQNPFIQPMHQMQLMQQTQVQPYHPPQQQEISQVQQQQQHHAQQGQGGAGTSQQ  
 QESGMSLHDYFKSPEAIQALLSDRDKLCQLLEQHPKLMQMLQEKLGQL

>Gh\_A04G1327GhVIR

MGRPEPCVLFSQTFVHTLDEYVDEVLFVFAEPVVITACEFLEQNASSASQAVSLVGATSPPSF  
 ALEVFVQSEGETRFRRLCQPFlySHSSSNVLEVEAVVTNHLVVRGSYRSLSLVYGNIAED  
 LGQFNIEFDDSSLTNLVGSADGKLEDLPLPLAFNRTFEESLSSLNVLSPVTLDLSEVK  
 QLLQQMLKILELPNLGHEVHKVVHTLALAAASFVTFDLESNAINQKHLTSGRNKDFKELN  
 HGISEARKELLELYETLQRKSTNKSSSESLTECIFMESDADLASSKQLVEMLSPCFHFNRSSS  
 NFGHGQLPESKNVILGLNVALFLCSTKESCFHFVNCGGMDQLAYLFDHQTQNSITITLLL  
 GVIEQATRHSVSGCEGFLGWWPREDENIPSGTSDGYSYLLKLLQKPRHDVASLATYILHRL  
 RFYEVISRYESEILSILGGLSATTKGTNAASNKLRGVGSLLKLLHLVISHGPIEDPSPVAHA  
 SRYFILGQTDGLVSYNATSGLIASSNCCFSDWEIDLHLLALLKDRGFLPLSAALLSTTVLHS  
 EAADVVDTSLEIVSSIGSILSLLFCRSGLVFLLHQPDLTATLIHALKGADAMNKEECVPLRY  
 ASVLISKGFTCNPEVGIIVETHLRVVAIDRLLSATPQSEEFWVLWELCGLARSDCGRQ  
 ALLAMSFSEVLSVLIEALHSVKESEPVIKNSGASPLNAILHSAAEIVEVIVTDSTATSLSS  
 WIGHAMELHKALHSSSPGNSNRKDAPTRLLEWIDAGLVYHKNAGVGLLRYAAVLASGGDA  
 HLTSTNVLVSDLTDVVDNIVGESSNASDINVMENLGSIIISMKSFEFVNLRDSSIAQLTTAFRI  
 LAFISENPTVAAALYDEGAITVIYVVLVNCSYMLERSNSYDYLVDGTECNSTSDLLER  
 NREQCLVDLLIPSLVLLITLLQRLQEAKEQHKNTKLMTALLRLHREVSPKLAACAADLSSP  
 YPDSALGFVAVCHLSVSALAYWPVYGWSPGLFHTILASVQTTSSALGPKETCSLLCLLND  
 LFPEESIWRWKNGMPLLSALRSLAIGTLLGPHKERQVDWYLECGHLEKLFNQLTPHLDRI  
 AQIIQHYAISALVVIQDMLRVFIIRIACQKAEQASKLLRPILSWIHDHSSDLSSLDTEAYKV  
 YRCLDFLTSLLEHPYAKVLLVGEFGPQILTRVLESCFDATDSQGRQASDCRDSAKYGVALLS  
 LCIPVFKSISLLCSSRTFSQYDERHEMHKFDLSLSPKDCSIFINQLLKFCQVLPVGKELVSLT  
 AFRDMGSCTEGCNALLSALLNSSSTHDELESERGNENKVNHFHFLNESEWRKSPPLCCW  
 IKLLKSIDSKDHLPSYTLAANVLSLGTGFCMGGNSLNMNSVVALKFLFGLPDDTAGIGG  
 FPEGNIKLYIQEFSTLLSSRIDNEDYQTSDDIHSMHQVSESVKSLLLLFQNLTAAEVDDAI  
 FYGDLSFPQHNQVPSGIQHFQGLDGKADDSHYSYSGGFEDKFSWELPETLPGRLLQTLPL  
 TRRKLQAADSANRSARGDNSVAEITNPTAFQRLGPSTASSGTTRRDSFRQRKPNTSRPPS  
 MHVDDYVARERSVDGVSNSNVIAVPRVGSSGGRPPSIHVDEFMARQRERGQNPAAAGTETA  
 TQSKNAAPINGPDNEKVNKSKQLKSDLDLQGDIVFDGEESETDDKLPFPQPDNDLQ  
 LAPVIFEQSSPQSVVEETESDVNGSSQFSHMATPLASNADENAQSEFSSRMSVSRPEMSLT  
 REPSVSSEKKIFEQSDSKNAVSIKNSSGFDASGNTSSGFSAPIYSNTPATSVQLSLDSRITP

QNFYPKSSAQYAGNIPVAAGSRGMYELKVLPNQPPLPPMPPPTILPVQSDYLSSVSGSPSL  
LQSSIPVSDSKFMRTSMPSPSGTTTRPPPLPSTPAPFASSPYNLASLNTSASQPALYNQSGMG  
KTELPGKSIGPTIDARLPTSAAGLASYPPLMQSLVFNRPSPVTPYGTSPALHQGENHPP  
GILNPSIPQSSMQTIHSLNQLQKLQRPLPTQHRLRPSMQSSQOLEQVVSQTPVQMIOQSL  
PMMHQAHISPVNPYYQPQQPEFSAAQQQMVELAQQQAPPQTGGTSQQQDSGMSLHEY  
FQSPEAIQSLLRDREKLCQLEQHPKLMQMLQVQFLH

>Gh\_D04G0886GhVIR

MGRPEPCVLFSTQTFVHTLDEYVDEVLFVFAEPVVITACEFLEQNASSASQAVSLVGATSPPSF  
ALEVFVQSEGETRFRRLCQPFYSHSSSNVLEVEAVVTNHLVVRGSYRSLSLVIYGNTAED  
LGQFNIEFDDSSLTNLVSSADGKLEDLPLPLCAFNRTFEESLSLNVLSLPVVTLDLSVEVKQ  
LLQQMLKILELPNLGHEVHEVHTLALAAASFVTFDLDSNAINQKHLTSGRNKDFKELNH  
GISEAKKELLELYETLQRKSMNESSESLTECIFMESDADLASSKQLVEMLSPCFHFNRSSSS  
FGHGQLPESNNVILGLNVALFLCSAKESCFHFVNCGGMDQLAYLFDHQMNSITITLLLLG  
VIEQATRHVSVCCEGLGWWPREDENIPSGTSDGYSYLLKLLQKPRHDVASLATYILHRLR  
FYEVISRYESEILSILGGLSATTKGTNVASNKLRGVGSLLKLLHLVISHGPIEDPSPVAHAS  
RYFILGQTDGLVSHKATSGLIASSNCCFSDWEIDLHLLALLKDRGFLPLSAALLSTITLHSE  
AADVVDTSLVIVSSIGSILSLLFCRSGLVFLLHQPDLTATLIHALKGADAMNKEECVPLRYA  
SVLISKGFTCSPQEVGIVETHLRVNVNAIDCLLSATPQSEEFVWLWELCGLARSDCGRQAL  
LAMSFFSEVLSVLIEALHSVKESEPVIKNSGASPLNAILHSAAEIVEVITDSTATSLSSWIG  
HAMELHKALHSSSPGSGNRKDAPTRLLEWIDAGLVYHKNGAVGLLRYAAVLASGGDAHLT  
STNILVSDLTVDVNDIVGESSNASDINVMENLGSISMKSFEFVNLRDSSIAQLTTAFRILAFI  
SENPTVAAALYDEGAITVIYVVLVNCYSYMLERSSNSYDYLVEGTECNSTSDLLERNREQ  
CLVDLLIPSLVLLITLLQRLQEAKEQHKN TKLMNALLRLHREVSPKLAACAADLSSPYPDS  
ALGFEAVCHLSVSALAYWPVYGWSPGLFHTILASVQTTSSLALGPKETCSLLCLLNDLFPE  
ESIWHWKNMGMLLSALRSLAIGTLLGPHKERQVDWYLECGHLEKLFNQLTPHLDRIAQII  
QHYAISALVVIQDMLRVFIIRIACQKAEQASKLLRPILSWIHDHTSDLSSLSDETEAYKVYRC  
LDFLTSLLEHPYAKVLLVGEFQPILTRVLESCFADTSDGRQASDCRDFAKYGFALISLCIP  
VFKSISLLCSSLTFPQYDERHEMHKFDLSPKDCSIFINQLLKFCQVLPVGKELVSCLTAFRD  
MGSCTEGRNALLSALLYSSSSTHDELESERGNEKNVNFHFLNESEWRKSPPLCCWIKLL  
KSIDSKDHLPPYTLEAANVLALGTLGFCMGGNSWNMNSVVALKFLFGLPDDTTGIGGFPE  
DNIKYIQEFSTLLSSRIHNDEDYQTSSDIHISMHQVSES VKSLLLLFQNLTA AVEVDDAILYG  
SLSFPQNNVQVPSGIQHFQGLDGKADDSLYSGGFEDRFSWELPETLPGRLLQTALPTRRK  
LQAADSANRSARGDNSVAEITNPTAFQRGLGPSTASSGTTTRDSFRQRKPNTSRPPSMHVD  
DYVARERSVDGVSNNSNVIAPVRVGSSGGRPPSIHVDEFMARQRERQNPAAAGTETAQSK  
NAAPINGPDNEKVNSKQKLSDLDDDLQGIDIVFDGEESETDDKLPFPQPDNLQQPAPVI  
FEQSSPQSVEETESDVNGSSQFSHMATPLASNADENAQSEFSSRMSVSRPEMSLTREPSV  
SSDKKFFEQSDDSKNAVSIKNSGGFDSASGTNSSGFSAPIYSNTPATSVQLPLDSRITPQNFY  
PKSSAQYAGNIPVAAGSRGMYEQKVLPNQPPLPPMPPPTILPVQSDYLSSVSGSPSLQSSI  
PVSDSKFMRTSMPSPSGTTTRPPPSLPSTPPPFASSPYNLASLNTSASQPALYNQSGVMGKTEL  
PQSGIGPTIDARLPTSAAGLASYPPLMQSLVFNRPSPVTPYGTSPALHQGENHPPPSILQ  
NPSIPQSSMQTIHSLNQLQKLQRPLPTQHRLRPSMQSSQOLEQVVSQTPVQMIOQSLPM  
MHQAHISPVNPYYLPQQPEFSAAQQQMVELAQQQAPPQTGGTSQQQDSGMSLHEYFQS  
PEAIQSLLRDREKLCQLEQHPKLMQMLQVQFLH

>Brara.C03117.1

MVRSEPCVLFQAQTFVHPQLDEYVDEVIFAEPVIITACEFLEQNASSSSQAVSLLGATSPPSFA  
LEVFRCEGESKFKRLCNPFYTPSAPYPLEVEAVVTNHLVVRGSYRSLSLVIYGNIVKDL  
GQYNIILEGRSVTDIVNSTEGNLEDLPLVLHVSVRTIEECLSSLDIVSLPLAAVDVPVEVKRL  
LQLLVKVFQDLATDDVLNKFVDTVVSGVSSYVTDNVDFFLKNKNCTAVASSVDSGIFHDI  
TDKVKKDILDLNEIQESDVPLGSSELLSFLSETNLATSQQQLVDMLSPIYQFESDSLCTAFPO  
LSKGKATLLGLSLAFLLCSGREGCLHFNVSNGGMDQLVFLFGHDVQNSTTITLLLLGVVEQ  
ATRHAVGCEGLGWWPREDGSIPSGKSEGYCLLLKLLMQKPCHEVASLAIYILHRLRIYEI  
VSRYEFAVLSALESLSNSHGAATHNLMQLSDAKSLOKLQKLMNSLGSVDSPSPAYAER  
SLVFDHSEGWLSYKATSKLTASWACPFNSGTDSHMLSLLKERGFLPLSAALLSIPGLHSEL  
GDILDVFTDIAMFIGNIILSLMFSRTGLSFLHHSQLTATIIQSLKGSVDLNKEECVPLRYASV  
LISKGFTCSLLEIGINLEVHLRVVSAVDRLLKSSPQTEEFGLILWELRDVSRSDCGREALTL  
GVFPEALAVLIEALNSVKDTPAVENSGISPLNLAICHSAAEIFEVIVSDSTVSLHAWIEHA  
PVLHKALHTLSPGGSNRKDAPSRLLKWIDAGVVYHKHGVVGLLRYAAVLASGGDAQLSS  
SSILALDLTSAENGVGESSNVSEMNGLDNLEKVILEKSFEGVNLSDSSISQLTTALRILALIS  
DNNTTVAALYDEGAVTVVYAILVNCFSMFERSSNIYDYLVDHGGCSSISDFLSERNREQS  
LVDLLIPSLVLLISVLQRLQDSKEQYRNTKLMKALLRLHREVSPKLAACAADLSSHYPDSA  
LGFGAVCHLIVSALVCWPVYGWMPGLFHSLLTGFTSSVPALGPKETCSFLCILSDILPEEG  
VWFWKSGMPLLSGLRKLAVGTLMSPPQKEKQINWYLEPAPLEKLLNYLTPNLDKIAKIIQH  
HVASALVVIQDMLRVFIVRIACQRVEHASILLRPIFASIREGILDESSTRETEAYKVYRYLNF  
LASLLEHPQSKGLLLEEGIVQLLEVVLQRCYCYRSTYPSEDREVQEFVIVSESSVIRWCVFRSI  
SLLCHSQVPLSCFPKKELLASLSAKDCASIFFVLKFCQVLPIGNELLSCLCAFKDLVSCSE  
GQDCLVSLVHLFSGLENPAYDTNNLSLDQVEMKKNPPFLSCWIKLLNSVNSKDGLSVLAI  
KAVNVLSVSSIRLCIDGKSLDSKKVAAIKSLFGLPSDFSDTDTFRVENIGLIEQMVTLLSSMT  
SGSDTSAIAEMKPCLHEVSQSLLSLLKDGNIIDITSIKIALVSTENFDMNDVDSENIEDDFL  
QRGLEDKFWWECPETLPERLPQSSLSAKRKLPTVESSSRRAKGENSSVDIPTQSSIQRVGS

ASLPAPTRRDTRFRQKTNTRPPSMHVDDYVARERSIDTAGNSNAITISRAGSSSGRPPSV  
HVDEYMARERRGQNPSTIVVGEATAQVKTPARETEKAAGKPKQFKADPDDDDLQGIDIV  
FDGEECEGADDKLPFLQPDENLMQAPVMVEQNSPHSIVEETESDANGSSQFSHMGTPLA  
SNVDENAQSEYSSRISVSRPEMSLIREPSSIDRKFVEQADETNKMPVPLKSEPGFVPGYNNI  
PGSSGQNLMDPRVGPQGFYSKSSQQQHSQGGFSGRGVYDQKMLPNQPPLPLVPPSS  
SHVMQHSDDLNSQSSPFSRGTSSGGGPIRHMPPHPSAIPQYSSNPYASLPPTSTVQTFG  
YNQGGAGTTEQQQQSGPGIDPQPGTGMTSYPPPNLMQSGYSRPFYGNPMHQGGDKQQQ  
NMLPVPSLNPHSIPQQLPSMQLQRPMPQPQHVRPPMQISQPSEQGISLQNQYQIPLHPMQ  
MMQQPQVQPYYPHPPQQQEISHVQQPQPPQQQAVQGGQAGTSQRQESGMSLHDYLSPE  
TIQALLSNREKLCELLEQNPKLMQMLQEKLQQQ

>GhCSX8308.D04G111100.1

MGRPEPCVLFSTQTFVHTLDEYVDEVLFPAEPVVITACEFLEQNASSASQAVSLVGATSPPSF  
ALEVQVQSEGETRFRRLCQPFYLSHSSSNVLEVEAVVTNHLVVRGSYRSLSLVIYGNTAED  
LGQFNIEFDDSSLTNLVSSADGKLEDLPLPLCAFNRTEESLSLNVLSLPVVTLDLSVEVKQ  
LLQQMLKILELPNLGHEVHEVVHTLALAAASFVTFDLDSNAINQKHLTSGRNKDFKELNH  
GISEAKKELLELYETLQRKSMNESSESLTECIFMESDADLASSKQLVEMLSPCFHNRRSSSS  
FGHGQLPESNNVILGLNVALFLCSAKESCFHFVNCGGMDQLAYLFDHQMNSITITLLLLG  
VIEQATRHVSVCCEGLGWWPREDENIPSGTSDGYSYLLKLLQKPRHDVASTATYILHRLR  
FYEVISRYESEILSILGGLSATTGKTNVASNKLRGVGSLLKLLHLVISHGPIEDPSPVAHAS  
RYFILGQTDGLVSHKATSGLIASSNCCFSDWEIDLHLLALLKDRGFLPLSAALLSTTILHSE  
AADVVDTSLVIVSSIGSILSLLFCRSGLVFLLHQPDLTATLIHALKGADAMNKEECVPLRYA  
SVLISKGFTCSPQEVGIIVETHLRVNAIDCLLSATPQSEEFVWLWELCGLARSDCGRQAL  
LAMSFFSEVLSVLIEALHSVKESEPVIKNSGASPLNLAILHSAAEIVEVIVTDSTATSLSSWIG  
HAMELHKALHSSSPGSGNRKDAPTRLLEWIDAGLVYHKNGAVGLLRYAAVLASGGDAHLT  
STNILVSDLTDDVVDNIVGESSNASDINVMENLGSISMKSFEQVNLRDSSIAQLTTAFRILAFI  
SENPTVAAALYDEGAITVIYVVLVNCYSMLERSSNSYDYLVDGTECNSTSDLLERNREQ  
CLVDLLIPSLVLLITLLQRLQEAKEQHKNTKMLNALLRLHREVSPKLAACAADLSSPYPDS  
ALGFEAVCHLSVSALAYWPVYGWSPGLFHTILASVQTTSSLALGPKETCSLLCLLNDLFPE  
ESIWHWKNGMPLLSALRSLAIGTLLGPHKERQVDWYLECGHLEKLFNQLTPHLDRIAQII  
QHYAISALVVIQDMLRVFIIRIACQKAEQASKLLRPILSWIHDHTSDLSSLSDETEAYKVYRC  
LDFLTSLLEHPYAKVLLVGEGFPQILTRVLESCFDATDSDGRQASDCRDFAKYGFALISLCIP  
VFKSISLLCSSLTFPQYDERHEMHKFDLSLSPKDCSIFINQLLKFCQVLPVGKELVSCLTAFRD  
MGSCTEGRNALLSALLYSSSTHDELESERGENKVNHFHFLNESEWRKSPPLCCWIKLL  
KSIDSKDHLPPYTLAANVLALGTLGFCMGGNSWNMNSVVALKFLFGLPDDTTGIGGPE  
DNIKYIQEFSTLLSSRIHNDEDYQTSSDIHISMHQVSESVKSLLLLFQNLTAAVEVDDAILYG  
SLSFPQNNVQVPSGIQHFQGLDGKADDSLYSGGFEDRFSWELPETLPGRLLQTALPTRRK  
LQAADSANRSARGDNSVAEITNPTAFQRLGPSTASSGTTRRDSFRQRKPNTRPPSMHVD  
DYVARERSVDGVSNSNVIAVPRVGSSGGRPPSIHVDEFMARQRERQNPAAAGTETAQSK  
NAAPINGPDNEKNVNSKQLKSDLDDDLQGIDIVFDGEESETDDKLPFPQPDNLQQAPVI  
FEQSSPQSVVEETESDVNGSSQFSHMATPLASADENAOSEFSSRMSVSRPMSLTREPVS  
SSDKKFFEQSDDSKNAVSIKNSGGFDSASGTNSSGFSAPIYSNTPATSVQQLPLDSRITPQNFY  
PKSSAQYAGNIPVAAGSRGMYEQKVLNQPPLPMPPPPPTILPVQSDYLSVSGSPSLQSSI  
PVSDSKFMRTSMPSPSGTTRPPPSLPSTPPPFASSPYNLASLNTSASQPALYNQSVMGKTEL  
PQGSIGPTIDARLPTSAAGLASYPPLMLQSLVFNRPSPSIPVTPYGTSPALHQGENHPPSILQ  
NPSIPQSSMQTIHSLNQLQKLQRPLOPTQHLRPSMQSSQQLQEQVSSQTPVQMQIQSLPM  
MHQAHISPVNPYLPQQQPEFSAAQQQMVELAQQQAPPQTGGTSQQQDSGMSLHEYFQS  
PEAIQSLLRDREKLCQLEQHPKLMQMLQEKLQQQ

>GhUGA230.D04G108000.1

MGRPEPCVLFSTQTFVHTLDEYVDEVLFPAEPVVITACEFLEQNASSASQAVSLVGATSPPSF  
ALEVQVQSEGETRFRRLCQPFYLSHSSSNVLEVEAVVTNHLVVRGSYRSLSLVIYGNTAED  
LGQFNIEFDDSSLTNLVSSADGKLEDLPLPLCAFNRTEESLSLNVLSLPVVTLDLSVEVKQ  
LLQQMLKILELPNLGHEVHEVVHTLALAAASFVTFDLDSNAINQKHLTSGRNKDFKELNH  
GISEAKKELLELYETLQRKSMNESSESLTECIFMESDADLASSKQLVEMLSPCFHFNRSSSS  
FGHGQLPESNNVILGLNVALFLCSAKESCFHFVNCGGMDQLAYLFDHQMNSITITLLLLG  
VIEQATRHVSVCCEGLGWWPREDENIPSGTSDGYSYLLKLLQKPRHDVASTATYILHRLR  
FYEVISRYESEILSILGGLSATTGKTNVASNKLRGVGSLLKLLHLVISHGPIEDPSPVAHAS  
RYFILGQTDGLVSHKATSGLIASSNCCFSDWEIDLHLLALLKDRGFLPLSAALLSTTILHSE  
AADVVDTSLVIVSSIGSILSLLFCRSGLVFLLHQPDLTATLIHALKGADAMNKEECVPLRYA  
SVLISKGFTCSPQEVGIIVETHLRVNAIDCLLSATPQSEEFVWLWELCGLARSDCGRQAL  
LAMSFFSEVLSVLIEALHSVKESEPVIKNSGASPLNLAILHSAAEIVEVIVTDSTATSLSSWIG  
HAMELHKALHSSSPGSGNRKDAPTRLLEWIDAGLVYHKNGAVGLLRYAAVLASGGDAHLT  
STNILVSDLTDDVVDNIVGESSNASDINVMENLGSISMKSFEQVNLRDSSIAQLTTAFRILAFI  
SENPTVAAALYDEGAITVIYVVLVNCYSMLERSSNSYDYLVDGTECNSTSDLLERNREQ  
CLVDLLIPSLVLLITLLQRLQEAKEQHKNTKMLNALLRLHREVSPKLAACAADLSSPYPDS  
ALGFEAVCHLSVSALAYWPVYGWSPGLFHTILASVQTTSSLALGPKETCSLLCLLNDLFPE  
ESIWHWKNGMPLLSALRSLAIGTLLGPHKERQVDWYLECGHLEKLFNQLTPHLDRIAQII  
QHYAISALVVIQDMLRVFIIRIACQKAEQASKLLRPILSWIHDHTSDLSSLSDETEAYKVYRC  
LDFLTSLLEHPYAKVLLVGEGFPQILTRVLESCFDATDSDGRQASDCRDFAKYGFALISLCIP  
VFKSISLLCSSLTFPQYDERHEMHKFDLSLSPKDCSIFINQLLKFCQVLPVGKELVSCLTAFRD

MGSCTEGRNALLSALLYSSSSTHDELESERGNEKNVNFHFLNESEWRKSPPLLCCWIKLL  
KSIDSKDHLPPYTLEAANVLALGTLGFCMGGNSWNMNSVVALKFLFGLPDDTTGIGGFPE  
DNIKYIQEFSTLLSSRIHNDEDYQTSSDIHISMHVQSVESVKSLLLLFQNLTAAVEVDDAILYG  
SLSFQNNVQVPSGIQHFQGLDQKADDSLYSGGFEDRFSWELPETLPGRLLQTALPTRRK  
LQAADSANRSARGDNSVAEITNPTAFQRLGPSTASSGTTRRDSFRQRKPNTSRPPSMHVD  
DYVARERSVDGVSNSNVIAPRVGSSGGRPPSIHVDEFMARQRERQNPAASGTETAAQSK  
NAAPINGPDNEKVNKSQKLSLDLDDDLQIDIVFDGEESETDDKLPFPQPDNDLQQPAPVI  
FEQSSPQSVEETESDVNGSSQFSHMATPLASNADENAQSEFSSRMSVSRPEMSLTREPSV  
SSDKKFFEQSDSKNAVSIKNSGGFDSASGTNSSGFSAPIYSNTPATSVQLPLDSRITPQNFI  
PKSSAQYAGNIPVAAGSRGMYEQKVLPNQPLPPMPPPTILPVQSDYLSSVSGSPSLLQSSI  
PVSDSKFMRTSMPSPSGTTRPPPSLPSTPPPFASSPYNLASLNTSASQPALYNQSVMGKTEL  
PQGSIGPTIDARLPTSAAGLASYPPPLMQSLVFNRRPSIPVTPYGTSPALHQGENHPPSILQ  
NPSIPQSSMQTIHSLNQLQKLQRPLQPTQHLRPSMQSSQQLQVVSQTPVQMQIQLSPM  
MQAHISPVPNPYLPQQPEFSAAQQMQVELAQQQAPPQTGGTSQQQDSGMSLHEYFQS  
PEAIQSLLRDREKLCQLLEQHPKLMQMLQEKLGQL

>Gotom.D04G118900.1

MGRPEPCVLFSQTFVHHTLDEYVDEVLFPAEPVVITACEFLEQNASSASQAVSLVGATSPPSF  
ALEVQVQSEGETRFRRLCQPFYSHSSSNVLEVEAVVTNHLVVRGSYRSLSLVIYGNTAED  
LGQFNIEFDDSSLTNLVSSADGKLEDLPLPLCAFNRTFEESLSLNVLSLPVVTLDLSVEVKQ  
LLQQMLKILELPNLGHEVHEVVHTLALAAASFVTFDLDSNAINQKHLTSGRNKDFKELNH  
GISEARKELLELYETLQRKSMNESFESLTCIFMESDADLASSKQLVEMLSPCFHFNRSSSS  
FGHGQLPESNNVILGLNVALFLCSAKESCFHFVNCGGMDQLAYLFDHQMNSITITLLLLG  
VIEQATRHSVGCEGFLGWWPREDENIPSGTSDGYSYLLKLLQKPGHDVASLATYILHRLR  
FYEVISRYESEILSILGGLSATTGKTNVASNKLRGVGSLLKLLHLVISHGPIEDPSPVAHAS  
RYFILGQTDGLVSYKATSGLIASSNCCFSDWEIDLHLLALLKDRGFLPLSAALLSTTILHSE  
AADVVDTSLEIVSSIGSIILSLLFCRSGLVFLLHQPDLTATLIHALKGADAMNKEECVPLRYA  
SVLISKGFTCSPQEVGIIVETHLRVNVNAIDCLLSATPQSEEFWVWLWELCGLARSDCGRQAL  
LAMSFFSEVLSVLIEALHSVKESEPVIKNSGASPLNLAILHSAEIVEVIVTDSTATSLSSWIG  
HAMELHKALHSSSPGSGNRKDAPTRLLEWIDAGLVYHKNGAVGLLRYAAVLASGGDAHLT  
STNILVSDLTDDVVDNIVGESSNASDINVMENLGSISMKSFEFVNLRDSSIAQLTTAFRILAFI  
SENPTVAAALYDEGAITVIYVVLVNCYMLERSSNSYDYLVDGTECNSTSDLLLERNREQ  
CLVDLLIPSLVLLITLLQRLQEAKEQHKNTKLMNALLRLHREVSPKLAACAADLSSPYPDS  
ALGEAVCHLSVLSALAYWPVYGWSPGLFHTILASVQTTSSLALGPKETCSLLCCLNDLFPE  
ESIWHWKNMPLLSALRSLAIGTLLGPHKERQVDWYLECGHLEKLFNQLTPLHDRIAQII  
QHYAISALVVIQDMLRVFIIRIACQKAEQASKLLRPILSWIHDHTSDLSSLDTEAYKVYRC  
LDFLTSLLEHPYAKVLLVGEFQILTRVLESCFDATDSDGRQASDCRDFAKYGFALISLCIP  
VFKSISLLCSSLTFPQYDERHEMHKFDSLSPKDCSIFINQLLKFCQVLPVGKELVSCLTAFRD  
MGSCTEGRNALLSALLYSSSSTHDELESERGNEKNVNFHFLNESEWRKSTPLLCCWIKLL  
KSIDSKDHLPPYTLEAANVLALGTLGFCMGGNSWNMNSVVALKFLFGLPDDTTGIGGFPE  
DNIKYIQEFSTLLSSRIHNDEDYQTSSDIHISMHVQSVESVKSLLLLFQNLTAAVEVDDAILYG  
SLSFQNNVQVPSGIQHFQGLDRKADDSLYSGGFEDRFSWELPETLPGRLLQTALPTRRK  
LQAADSANRSARGDNSVAEITNPTAFQRLGPSTASSGTTRRDSFRQRKPNTSRPPSMHVD  
DYVARERSVDGVSNSNVIAPRVGSSGGRPPSIHVDEFMARQRERQNPAASGTETAAQSK  
NAAPINGPDNEKVNKSQKLSLDLDDDLQIDIVFDGEESETDDKLPFPQPDNDLQQPAPVI  
FEQSSPQSVEETESDVNGSSQFSHMATPLASNADENAQSEFSSRMSVSRPEMSLTREPSV  
SSDKKFFEQSDSKNAVSIKNSGGFDSASGTNSSGFSAPIYSNTPATSVQLPLDSRITPQNFI  
PKSSAQYAGNIPVAAGSRGMYEQKVLPNQPLPPMPPPTILPVQSDYLSSVSGSPSLLQSSI  
PVSDSKFMRTSMPSPSGTTRPPPSLPSTPPPFASSPYNLASLNTSASQPALYNQSVMGKTEL  
PQGSIGPTIDARLPTSAAGLASYPPPLMQSLVFNRRPSIPVTPYGTSPALHQGENHPPSILQ  
NPSIPQSSMQTIHSLNQLQKLQRPLQPTQHLRPSMQSSQQLQVVSQTPVQMQIQLSPM  
MQAHISPVPNPYLPQQPEFSAAQQMQVELAQQQAPPQTGGTSQQQDSGMSLHEYFQS  
PEAIQSLLRDREKLCQLLEQHPKLMQMLQEKLGQL

>Godar.D04G116500.1

MGRPEPCVLFSQTFVHHTLDEYVDEVLFPAEPVVITACEFLEQNASSASQAVSLVGATSPPSF  
ALEVQVQSEGETRFRRLCQPFYSHSSSNVLEVEAVVTNHLVVRGSYRSLSLVIYGNTAED  
LGQFNIEFDDSSLTNLVSSADGKLEDLPLPLCAFNRTFEESLSLNVLSLPVVTLDLSVEVK  
QLLQQMLKILELPNLGHEVHEVVHTLALAAASFVTFDLDSNAINQKHLTSGRNKDFKELNH  
HGISEARKELLELYETLQRKSMNESSESLETCIFMESDADLASSKQLVEMLSPCFHFNRSSSS  
SFGHGQLPESNNVILGLNVALFLCSAKESCFHFVNCGGMDQLAYLFDHQMNSITITLLLL  
GVIEQATRHSVGCEGFLGWWPREDENIPSGTSDGYSYLLKLLQKPRHDVASLATYILHRL  
RFYEVISRYESEILSILGGLSATTGKTNVASNKLRGVGSLLKLLHLVISHGPIEDPSPVAHA  
SRYFILGQTDGLVSYKATSGLIASSNCCFSDWEIDLHLLALLKDRGFLPLSAALLSTTILHSE  
AADVVDTSLEIVSSIGSIILSLLFCRSGLVFLLHQPDLTATLIHALKGADAMNKEECVPLRYA  
SVLISKGFTCSPQEVGIIVETHLRVNVNAIDCLLSATPQSEEFWVWLWELCGLARSDCGRQAL  
LAMSFFSEVLSVLIEALHSVKESEPVIKNSGASPLNLAILHSAEIVEVIVTDSTATSLSSWIG  
HAMELHKALHSSSPGSGNRKDAPTRLLEWIDAGLVYHKNGAVGLLRYAAVLASGGDAHLT  
STNILVSDLTDDVVDNIVGESSNASDINVMENLGSISMKSFEFVNLRDSSIAQLTTAFRILAFI  
SENPTVAAALYDEGAITVIYVVLVNCYMLERSSNSYDYLVDGTECNSTSDLLLERNREQ  
CLVDLLIPSLVLLITLLQRLQEAKEQHKNTKLMNALLRLHREVSPKLAACAADLSSPYPDS

ALGFEAVCHLSVSALAYWPVYGWSPGLFHTILASVQTTSSLALGPKETCSLLCLLNDLFPE  
ESIWHWKNGMPLLSALRSLAIGTLLGPHKERQVDWYLECGHLEKLFNQLTPHLDRIAQII  
QHYAISALVVIQDMLRVFIIRIACQKAEQASKLLRPILSWIHDHTSDLSSSLDTEAYKVYRC  
LDFLTSLLEHPYAKVLLVGEFGPQILTRVLESCFDATDSDGRQASDCRDFAKYGFALISLCIP  
VFKSISLLCSSLTFPQYDERHEMHKFDLSLSPKDCSIFINQLLKFCQVLPVVGKELVSLTAFRD  
MGSCTEGRNALLSALLYSSSSTHDELESERGNEKNVNFHFLNESEWRKSPPLCCWIKLL  
KSIDSKDHLPPYTLEAANVLALGTLGFCMGGNSWNMNSVVALKFLFGLPDDTTGIGGFPE  
DNIKYIQQFSTLLSSRIHNDEDYQTSSDIHISMHQVSESVKSLLLLFQNLTAAVEVDDAILYG  
SLSFPQNNVQVPSGIQHFGQGLDGKADDLSYSGGFEDRFSWELPETLPGRLLQTALPTRRK  
LQAADSANRSARGDNSVAEITNPATFQRLGPSTASSGTTRRDSFRQRKPNTSRPPSMHVD  
DYVARERSVDGVSNSNVIAPRVGSSGGRPPSIHVDEFMARQRERQNPAASTGTETAQSK  
NAAPINGPDNEKVNSKQLKSDLDDDLQIGDIVFDGEESETDDKLPFPQPDNLQQPAPVI  
FEQSSPQSVEETESDVNGSSQFSHMATPLASNADENAQSEFSSRMSVSRPEMSLTREPSV  
SSDKKFFEQSDSKNAVSIKNSGGFDSASGTNSSGFSAPIYSNTPATSVQLPLDSRITPQNIFY  
PKSSAQYAGNIPVAAGSRGMYEQKVLPNQPPLPMPPPPPTILPVQSDYLSSVSGSPSLQSSI  
PVSDSKFMRTSMPSGPTTRPPPLPSTPPPFASSPYNLASLNTSASQPALYANQSVMGKTEL  
PQGSIGPTIDARLPTSAAGLASYPPLMQSIVFNRPPSIPVTPYGTSPALHQGENHPPSILQN  
PSIPQSSMQTIHSLNQLQKLQRPLQPTQHLRPSMQSSQQLQVSSQTPVQMQLQSLPMM  
HQAHPVNPYPYLPQQPEFSAQQQMQVELAQQQAPPQTGGTSQQQDSGMSLHEYFQSP  
EAIQSLLRDREKLCQLLEQHPKLMQMLQEKLQGL

>Thecc.05G105900.1

MGRPESCVLFSQTFVHHTLDEYVDEVLFPAEPVVITACEFLEQNASSASQAVSLVGATSPPSF  
ALEVQVQCEGETRFRRLCQPFYTHSSSNVLEVEAVVTNHLVVRGSYRSLSLVIYGNTAQD  
LGQFNIEFDDSSLPDLVSSADGKLEDLPLALRTINRTFEESLCSLNVISLPVVKLDLSVEVNQ  
LLQLMLKILELANVGYAVHKVLSTVASAASSLISFDLDSNAIHQKYLMSERNKDFKELDH  
GISEARKNLLELYEALQYKSMNGSSSESLTECSFMESEADLASSKQLVEMLLPYFNFNRSSS  
SFGHHQLSESKNVILGLNVALFLCSSKESCFHFVNCGGMDQLAYLLDHDMDQKSTAITLLL  
GVIEQATRHSVGCCEGLGWWPREDENIPSGTSDGYSHLLKLLQKPRHDIASLATYVLHR  
LRFYEVVSRYEYEVLSILGGLSAAAKGTSVASNKLVGVGSLKLLHLVKSHGRIEDPSPV  
AHASSFLILGQTDILVSYKATSGLIASSNCCFSNWEIDSHLLALLKDRGFLPLSAALLSTTIL  
HSEAEDVVNISMEIVSSIGSIIVSFLFCRSGLVFLLHQPELTATLIHALKGADAMSKEECVPL  
RYASVLISKGFTCSPQEVGIIVETHLRVNAIDRLLSSTPQSEEFWVLWELCGLARSDCGR  
QALLALSFPEVLSILIEALHSVKETEPAIKNSGAAPLNAILHSAAEIVEVITDSTATSLSS  
WIGHAMELHKALHSSPGSNRKDAPTRLLEWIDAGLVYHKNGAIGLLRYANQSVMGKTEL  
LTSTNILVSDLTDDVDNVIGESSNASDINVMENLGGIISLKSFDGVSRLRDSSIAQLTTAFRILA  
FISENPTVAAALYDEGAIAVIYVVLVNCFSMLERSSNNYDYLVDGTECNSTSDLLERNR  
EQSLVDLLVPSLVLLITLLQKLQEANEQHRNTKLMNALLRLHREVSPKLAACAADLSSYP  
DSALGFEAVCHLVVSALAYWPVYGWTPGLFHSLLASVQATSSLALGPKETCSLMCLLND  
MFPEEGVWLWKNGMPLLSALRSLAIGTLLGPHKERQVDWYLERGHLEKLLNQLMPQLD  
KIAQIIQHYAISALVVIQDMLRVFIIRIACQKAEHASKLLRPILSWIHDHTSDLSSPSDLDAYK  
VYRFLDFLASLLEHPYSKAVLLGEGFSQILKRVLESCFVATDSDGKQISDCGNSASCFTLI  
NWCIPVFQISILLCSSRTFSQNNGRHDMHKFDGLSPKECLLFINQLLKFCQVLPVVGKELVS  
CLQAFKDLGSCAEGRSFMSALLHGGNSSGGALESESGHEKNGNFHFQNESELRKSPPL  
CCWKKLLRSVDSKDSSLAYAIEAVNALSLGSLCFCMDGKSLNMNAVVALKFLFGFPDDM  
AGIGGLPEENINYIQEFSTLLSSRIINDDYQSPSDMHISMCMQVSESVKSLLLLFQISTGTVKV  
DDTILNEILSLPQNDVQVPLRIHQMAQNGGKADDDLYLGGFEDKFSWELPETLPDRLPQ  
TALPTRRKLPADSSSTRRARGDNSVTEITNPNAFSRGLGPSTVPPGTTRRDTFRQRKPNTS  
RPPSMHVDYVARERSVDGVTNSNAIAVQRVGSSGGRPPSIHVDEFMARQRERQNPAAV  
AETAAQSKNAAPINGADNEKVNSKQLKTDLDDDLHGIDIVFDGEESETDDKLPFPQPD  
NLQQPASVIVEQSSPHSVVEETESDVNGSSQFSHMGTPLASNVDENAHSEFSSRMSVSRPE  
MPLTREPSVSSDKKFFEKSEDSKNAISIKNSSRFDASAAGANSSGFSAPVYSNTPPTSQVLP  
DSRITPQNIFYPKSSPYASNIPGAVGSRGMYEQKVLPNQPPLPMPPPSAIPPGQSDYLSAV  
SGSPSLQSSLSVSDSKFMRTSMSSPSGNTRPPPLPSTPPPFASSPYNLASVNASTSQPSVY  
NHSGMGKTELPOSSIGPTIDARLPASAAGLTSYPPPLMQSLVFNRPASIPITPYGSTPAQQQG  
ENPPSMLQNPSPSQSSIQSMHSLAQLQLPQLQRPLQPAQHLRPSMQSSQQLDQGVSLQTP  
VQMOMQSLQMLQQSHVSPVNPYHQSQQQEFSAPQQQLQVELSQPVVQQGGGASQQQQ  
DSGMSLHEYFQSPQAIQSLLRDREKLCQLLEQHPKLMQMLQEKLQGL

>Gomus.D04G110200.1

MGRPEPCVLFSQTFVHHTLDEYVDEVLFPAEPVVITACEFLEQNASSASQAVSLVGATSPPSF  
ALEVQVQSEGETRFRRLCQPFYTHSSSNVLEVEAVVTNHLVVRGSYRSLSLVIYGNTAED  
LGQFNIEFDDSSLTNLVSSADGKLEDLPLPLCAFNRTFEESLSSLNVLSLPVVTLDLSVEVK  
QLLQQMLKILELPNLGHEVHEVVHTLALAAASFVTFDLDNAINQKHLTSGRNKDFKELN  
HGISEARKLELLELYETLQRKSMNESSESLTECFMESDADLASSKQLVEMLSQCFHFNRSSS  
SFGHGQLPESNVILGLNVALFLCSAKESCFHFVNCGGMDQLAYLFDHQMPCNSITITLLL  
GVIEQATRHSVGCCEGLGWWPREDENIPSGTSDGYSYLLKLLQKPRHDVASLATYILHRL  
RIFYEVISRYESEILSILGGLSATTKGTNVASNKLRGVGSLLKLLHLVISHGPIEDPSVAHA  
SRYFILGQTDGLVSYKATSGLIASSNCCFSDWEIDLHLLALLKDRGFLPLSAALLSTTILHSE  
AADVVDTSLEIVSSIGSIILSLLFCRSGLVFLLHQPDLTATLIHALKGADAMNKEECVPLRYA  
SVLISKGFTCSPQEVGIIVETHLRVNAIDCLLSATPQSEEFWVLWELCGLARSDCGRQAL

LAMSFSEVLSVLIEALHSVKESEPVIKNSGASPLNLAILHSAAEIVEVIVTDSTATSLSSWIG  
HAMELHKALHSSSPGNSNRKDAPTRLLEWIDAGLVYHKNGAVGLLRYAAVLASGGDAHLT  
STNILVSDLTDVVDNIVGESSNASDINVMENLGSIIISMKSFEQVNLDRSSIAQLTTAFRILAFI  
SENPTVAAALYDEGAITVIYVVLVNCYSMLERSSNSYDYLVEGTECNSTSDLLERREQ  
CLVDLLIPSLVLLITLLQRLQEAKEQHKNTKLMNALLRLHREVSPKLAACAADLSSPYPDS  
ALGFEAVCHLSVSALAYWPVYGWSPGLFHTILASVQTTSSLALGPKETCSLLCLLNDLFPE  
ESIWHWKNMPLLSALRSLAIGTLLGPHKERQVDWYLECGHLEKLFNQLTPHLDRIAQII  
QHAYISALVVIQDMLRVFIIRIACQKAEQASKLLRPILSWIHDHTSDLSSLSDETEAYKVYRC  
LDFLTSLLEHPYAKVLLVGEDFPQILTRVLESCFDTSDGRQASDCRDFAKYGFALISLCIP  
VFKSISLLCSSLTFPQYDERHEMHKFDLSLSPKDCSIFTNQLLKFCQVLPVGKELVSCLTAFR  
DMGSCTEGRNALLSALLYSSSSTHDELESERGNEKNVNFHFLNESEWRKSPPLCCWIKL  
LKSIDSKDHLPPYTLEAANVLALGTLGFCMGGNSWNMNSVVALKFLFGLPDDTTGIGGFP  
EDNIKYIQEFSTLLSSRIHNDEDYQTSSDIHISMHQVSESVKSLLLLFQNLTAAVEVDDAILY  
GSLSPQNNVQVPSGIQHFQGLDGGKADDSLYSGGFEDRFSWELPETLPGRLLQTALPTRR  
KLQAADSANRSARGDNSVAEITNPTAFQRLGPSTASSGTTRRDSFRQRKPNTRSPPSMHV  
DDYVARERSVDGVSNNSNVIAPRVGSSGRPPSIHVDEFMARQRERQNPAAAGTETA  
KNAAPINGPDNEKVNKSKQLKSDLDDDLQGDIVFDGEESETDDKLFPQPDDNLQQPAP  
VIFEQSSPQSVVEETESDVNGSSQFSHMATPLASNADENAQSEFSSRMSVSRPEMSLTREPS  
VSSDKKFFEQSDDSKNAVSINKNSGGFDSASGTNSSGFSAPIYSNTPATSVQLPLDSRITPQNF  
YPKSSAQYAGNIPVAAGSRGMYEQKVLPNQPPLPPMPPPTILPVQSDYLSSVSGSPSLLQS  
SIPVSDSKFMRTSMPSPGTTRPPPLPSTPPPFASSPYNLASLNTSASQPALYNQSVMGKTE  
LPQGSIGPTIDARLPTSAAGLASYPPLMQSLVFNRPSPSIPVTPYGTSPALHQGENHPPSILQ  
NPSIPQSSMQTIHSLNQLQKLQRLPQPTQHLRPSMQSSQLEQVVSQTPVQMIOQSLPM  
MHQAHISPVNPYYLPQQPEFSAQQQMVELAQQQAPPQTGGTSQQQDSGMSLHEYFQS  
PEAIQSLLRDREKLCQLLEQHPKLMQMLQEKLGL

>Gotom.A04G077000.1

MGRPEPCVLFSQTFVHHTLDEYVDEVLFPAEPVVITACEFLEQNASSASQAVSLVGATSPPSF  
ALEVVFVQSEGETRFRRLCQPFYSHSSSNVLEVEAVVTNHLVVRGSYRSLSLVIYGNTAED  
LGQFNIEFDDSSLTNLVSSADGKLEDLPLPLAFNRFTFEESLSSLNVLSPVVTLDLSVEVK  
QLLQQMLKILELPNLGHEVHKVVHTLALAAASFVTFDLESNAINQKHLTSGRNKDFKELN  
HGISEARKELLELYETLQRKSTNKSSSELTCEIFMESDADLASSKQLVEMLSPCFHFNRSSS  
NFGHGQLPESKNVILGLNVALFLCSTKESCFHFVNCGGMDQLAYLFDHQTQNSITITLLLL  
GVIEQATRHSVCEGFLGWWPREDENIPSGTSDGYSYLLKLLQKPRHVDASLATYILHRL  
RFYEVISRYESELILGGLSATTKGNTAASNKLRGVGSLLKLLHLVISHGPIEDPSPVAHA  
SRYFILGQTDGLVSYNATSGLIASSNCCFSDWEIDLHLLALLKQDRGFLPLSAALLSTTVLH  
SEAADVVDTSLEIVSSIGSIILSLLFCRSGLVFLLHQPDLTATLIHALKGADAMNKEECVPLR  
YASVLISKGFTCNPQEVGIIVETHLRVNVNAIDRLLSATPQSEEFLLVWLWELSGLARSDCGRQ  
ALLAMSFSEVLSVLIEALHSVKESEPVIKNSGASPLNLAILHSAAEIVEVIVTDSTATSLSS  
WIGHAMELHKALHSSSPGNSNRKDAPTRLLEWIDAGLVYHKNGAVGLLRYAAVLASGGDA  
HLTSTNILVSDLTDVVDNIVGESSNASDINVMENLGSIIISMKSFEQVNLDRSSIAQLTTAFRI  
LAFISENPTVAAALYDEGAITVIYVVLVNCYSMLERSSNSYDYLVEGTECNSTSDLLER  
NREQCLVDLLIPSLVLLITLLQRLQEAKEQHKNTKLMTALLRLHREVSPKLAACAADLSSP  
YPDSALGFEAVCHLSVSALAYWPVYGWSPGLFHTILASVQTTSSLALGPKETCSLLCLLND  
LFPEESIWRWKNMPLLSALRSLAIGTLLGPHKERQVDWYLECGHLEKLFNQLTPHLDRI  
AQIIQHAYISALVVIQDMLRVFIIRIACQKAEQASKLLRPILSWIHDHSSDLSLSDTEAYKV  
YRCLDFLTSLLEHPYAKVLLVGEGFPQILTRVLESCFDTSDGRQASDCRDSAKYGFALIS  
LCIPVFKSISLLCSSRTFSQYDERHEMHKFDLSLSPKDCSIFINQLLKFCQVLPVGKELVSCLT  
AFRDMGSCTEGCNALLSALLNSSSSTHDELESERGNEKNVNFHFLNESEWRKSPPLCCW  
IKLLKSIDSKDHLPPYTLEAANVLSLGTGFCMGGNSLNMNSVVALKFLFGLPDDTAGIGG  
FPEDNIKYIQEFSTLLSSRIDNDEDYQTSSDIHISMHQVSESVKSLLLLFQNLTAAVEVDDAI  
LYGGLSFPQNNVQVPSGIQHFQGLDGGKADDSLYSGGFEDKFSWELPETLPGRLLQTALP  
TRRKLQAADSANRSARGDNSVAEITNPTAFQRLGPSTASSGTTRRDSFRQRKPNTRSPPS  
MHVDDYVARERSVDGVSNNSNVIAPRVGSSGRPPSIHVDEFMARQRERQNPAAAGTETA  
TQSKNAAPINGPDNEKVNKSKQLKSDLDDDLQGDIVFDGEESETDDKLFPQPDDNLQQ  
LAPVIFEQSSPQSVVEETESDVNGSSQFSHMATPLASNADENAQSEFSSRMSVSRPEMSLT  
REPSVSSEKKFFEQSDDSKNAVSINKNSGGFDSASGTNSSGFSAPIYSNTPATSVQLSLDSRITP  
QNFYYPKSSAQYAGNIPVAAGSRGMYELKVLPNQPPLPPMPPPTILPVQSDYLSSVSGSPSL  
LQSSIPVSDSKFMRTSMPSPGTTRPPPLPSTPPPFASSPYNLASLNTSASQPALYNQSGMG  
KTELPGKSIGPTIDARLPTSAAGLASYPPLMQSLVFNRPSPSIPVTPYGTSPALHQGENHPP  
GILQNPSIPQSSMQTIHSLNQLQKLQRLPQPTQHLRPSMQSSQLEQVVSQTPVQMIOQSLP  
PMMHQAHSIPVNPYYLPQQPEFSAQQQMVELAQQQAPPQTGGTSQQQDSGMSLHEY  
FQSPEAIQSLLRDREKLCQLLEQHPKLMQMLQEKLGL

>Gorai.009G393700.1

MGRPEPCVLFSQTFVHHTLDEYVDEVLFPAEPVVITACEFLEQNASSASQAVSLVGATSPPSF  
ALEVVFVQSEGEARFRRLCQPFYSHSSSNVLEVEAVVTNHLVVRGSYRSLSLVIYGNTAED  
LGQFNIEFDDSSLTNLVSSADGKLEDLPLPLCAFNRFTFEESLSSLNVLSPVVTLDLSVEVK  
QLLQQMLKILELPNLGHEVHEVVHTLALAAASFVTFDLDNAINQKHLTSGRNKDFKELN  
HGISEARRELLELYETLQRKSMNESSELTCEIFMESDADLASSKQLVEMLSPCFHFNRSSS  
SFGHGQLPESNNVILGLNVALFLCSAKESCFHFVNCGGMDQLAYLFDHQMQNSITITLLLL

GVIEQATRHSVGCEGFLGWWPREDENIPSGTSDGYSYLLKLLQKPRHDVASLATYILHRL  
RFYEVISRYESEILSILGGLSATTCKGTNVASNKLRGVGSLLKLLHLVISHGPIEDPSPVAHA  
SRYFILGQTDGLVSYKATSGLIASSNCCFSDWEIDLHLLALLKDRGFLPLSAALLSTTILHSE  
AADVVDTSLEIVSSIGSIILSLLFCRSGLVFLLHQPDLTATLIHALKGADAMNKEECVPLRYA  
SVLISKGFTCSPQEVGIIVETHLRVNVNAIDCLLSATPQSEEFWVWLWELCGLARSDCGRQAL  
LAMSFFSEVLSVLIEALHSVKESEPVIKNSGASPLNLAILHSAAEIVEVIVTDDSTATSLSSWIG  
HAMELHKALHSSSPGSGNRKDAPTRLLEWIDAGLVYHKNAGVGLLRYAAVLASGGDAHLT  
STNILVSDLTDDVNDIVGESSNASDINVMENLGSIIISMKSFEQVNLRDSSIAQLTTAFRILAFI  
SENPTVAAALYDEGAITVIYVVLVNC SYMLERSSNSYDYLVDEGTECNSTSDLLLERNREQ  
CLVDLLIPSLVLLITLLQRLQEAKEQHKN TKLMNALLRLHREVSPKLAACAADLSSPYPDS  
ALGFEAVCHLSVSALAYWPVYGWSPGLFHTILASVQTTSSLALGPKETCSLLCLLNDLFPE  
ESIWCWKNGMPLLSALRSLAIGTLLGPHKERQVDWYLECGHLEKLFNQLTPHLDRIAQIIQ  
HYAISALVVIQDMLRVFIIRIACQKAEQASKLLRPILSWIHDHTSDLSLSDTEAYKVYRCL  
DFLASLLEHPYAKVLLVGEFGFPQILTRVLESCFDATDS DGRQASDCRDFAKYGFALISLCIP  
VFKSISLLCSSLMFPQYDERHEMHKFDLSLSPKDCSIFINQLLKFCQVLPVGKELVSCLTAFR  
DMGSCTEGRNALLSALLYSSSSTHDELESERGNEKNVNFHFLNESEWRKSPPLCCWIKL  
LKSIDSKDHLPPYTLEAANVLA LGTLGFCMGGNSWNMNSVVALKFLFGLPDDTTGIGGFP  
EDNIKYIQEFSTLLSSRIDNDEDYQTSSDIHISMHQVSES VKSLLLLFQNLTA AIEVDDAILY  
GSLSPQNNVQVPSGIQHFQGLD GKAADD SLYSGGFEDRFSWELPETLPGRLLQTALPTRR  
KLQAADSANRSARGDNSVAEITNPTAFQRGLGPSTASSGTTRRDSFRQRKPNTSRPPSMHV  
DDYVARERSVDGVSN SNVIAVPRVGSSGGRPPSIHVDEFMARQRERQNPAASGTETAQAS  
KNAAPINGPDNEKVNKSKQLKSDLDLDDLGIDIVFDGEESETDDKLPFPQPDNDLQQPAP  
VIFEQSSPQSVVEETESDVNGSSQFSHMATPLASNADENAQSEFSSRMSVSRPEMSLTREPS  
VSSDKKFFEQSDDSKNAVSIKNSSGFDSASGTNSSGFSAPIYSNTPATSVQLPLDSRITPQNF  
YPKSSAQYAGNIPVAAGSRGMYEQKVL PNQPPPLPPMPPPTILPVQSDYLSSVSGSPSLLQS  
SIPVSDSKFMRTSMPSPSGTTRPPPPPLSTPPPFASSPYNLASLNTSASQPALYNQSVMGKTE  
LPQGSIGPTIDARLPTS AAGLASYP PPLMQSLVFNRPSPIPVTPYGTSPALHQGENHPPSILQ  
NPSIPQSSMQTIHSLNQLQKLQRPLQPTQHLRPSMQSSQQL EQVVSSQTPVQM QIQSLPM  
MHQAHISPVNPYYLPQQPEFSAAQQQM QVELAQQQAPPQTGGTSQQQDSGMSLHEYFQS  
PEAIQSLLRDREKLCQLLEQHPKLMQMLQEKL GQL

>GhCSX8308.A04G071600.1

MGRPEPCVLFSTQTFVHTLDEYVDEVLF AEPVVITACEFLEQNASSASQAVSLVGATSPPSF  
ALEFVQSEGETRFRRLCQPFLYSHSSSNVLEAVEVTNHLVVRGSYRSLSLVIYGNTAE  
LGQFNIEFDSSLTNLVGSADGKLEDLPPLRAFNRTFEESLSSLNVLSLPVVTLDLSVEVK  
QLLQQMLKILELPNLGHEVHKVVHTLALAAASFVTFDLESNAINQKHLTSGRNKDFKELN  
HGISEARKELLELYETLQRKSTNKSSSESLTECIFMESDADLASSKQLVEMLSPCFHFNRSSS  
NFGHGQLPESKNVILGLNVALFLCSTKESCFHFVNCGGMDQLAYLFDHQTQNSITITLLLL  
GVIEQATRHSVGCEGFLGWWPREDENIPSGTSDGYSYLLKLLQKPRHDVASLATYILHRL  
RFYEVISRYESEILSILGGLSATTCKGTNAASNKLRGVGSLLKLLHLVISHGPIEDPSPVAHA  
SRYFILGQTDGLVSYNATSGLIASSNCCFSDWEIDLHLLALLKDRGFLPLSAALLSTTVLHS  
EAADVVDTSLEIVSSIGSIILSLLFCRSGLVFLLHQPDLTATLIHALKGADAMNKEECVPLRY  
ASVLISKGFTCNPQEVGIIVETHLRVNVNAIDRLLSATPQSEEFWVWLWELCGLARSDCGRQ  
ALLAMSFFSEVLSVLIEALHSVKESEPVIKNSGASPLNLAILHSAAEIVEVIVTDDSTATSLSS  
WIGHAMELHKALHSSSPGSGNRKDAPTRLLEWIDAGLVYHKNAGVGLLRYAAVLASGGDA  
HLTSTNILVSDLTDDVNDIVGESSNASDINVMENLGSIIISMKSFEQVNLRDSSIAQLTTAFRI  
LAFISENPTVAAALYDEGAITVIYVVLVNC SYMLERSSNSYDYLVDEGTECNSTSDLLLER  
NREQCLVDLLIPSLVLLITLLQRLQEAKEQHKN TKLMTALLRLHREVSPKLAACAADLSSP  
YPDSALGFEAVCHLSVSALAYWPVYGWSPGLFHTILASVQTTSSLALGPKETCSLLCLLND  
LFPEESIWRWKNGMPLLSALRSLAIGTLLGPHKERQVDWYLECGHLEKLFNQLTPHLDRI  
AQIIQH YAISALVVIQDMLRVFIIRIACQKAEQASKLLRPILSWIHDHSSDLSLSDTEAYKV  
YRCLDFLTSLLEHPYAKVLLVGEFGFPQILTRVLESCFDATDS DGRQASDCRDS AKYGV  
ALISLCIPVFKSISLLCSSRTFSQYDERHEMHKFDLSLSPKDCSIFINQLLKFCQVLPVGKELVSCLT  
AFRDMGSCTEGCNALLSALLNSSSSTHDELESERGNEKNVNFHFLNESEWRKSPPLCCW  
IKLLKSIDSKDHLPSYTLEAANVLSL GTLGFCMGGNSLNMNSVVALKFLFGLPDDTAGIGG  
FPEDNIKYIQEFSTLLSSRIDNDEDYQTSSDIHISMHQVSES VKSLLLLFQNLTA AAVEVDDAI  
LYGGLSFPQNNVQVPSGIQHFQGLD GKAADD SLYSGGFEDKFSWELPETLPGRLLQTALP  
TRRKLQAADSANRSARGDNSVAEITNPTAFQRGLGPSTASSGTTRRDSFRQRKPNTSRPPS  
MHVDDYVARERSVDGVSN SNVIAVPRVGSSGGRPPSIHVDEFMARQRERQNPAASGTETA  
TQSKNAAPINGPDNEKVNKSKQLKSDLDLDDLGIDIVFDGEESETDDKLPFPQPDNDLQQ  
LAPVIFEQSSPQSVVEETESDVNGSSQFSHMATPLASNADENAQSEFSSRMSVSRPEMSLT  
REPSVSSEKKIFEQSDDSKNAVSIKNSSGFDSASGTNSSGFSAPIYSNTPATSVQLSLDSRITP  
QNFYYPKSSAQYAGNIPVAAGSRGMYELKVL PNQPPPLPPMPPPTILPVQSDYLSSVSGSPSL  
LOSSIPVSDSKFMRTSMPSPSGTTRPPPPPLSTPPPFASSPYNLASLNTSASQPALYNQSGMG  
KTELPKGSIGPTIDARLPTS AAGLASYP PPLMQSLVFNRPSPIPVTPYGTSPALHQGENHPP  
GILQNPSIPQSSMQTIHSLNQLQKLQRPLPTQHLRPSMQSSQQL EQVVSSQTPVQM QIQSLP  
PMMHQA HISPVPNPYYLPQQPEFSAAQQQM QVELAQQQAPPQTGGTSQQQDSGMSLHEY  
FQSP EAIQSLLRDREKLCQLLEQHPKLMQMLQEKL GQL

>Godar.A04G073500.1

MGRPEPCVLFSTQTFVHTLDEYVDEVLF AEPVVITACEFLEQNASSASQAVSLVGATSPPSF



ALEVFVQSEGETRFRRLCQPFlySHSSSNVLEVEAVVTNHLVVRGSYRSLSLVIYGNTAED  
LGQFNIEFDDSSLTNLVSSADGKLEDLPLPLAFNRTFEESLSSNLVLSLPVVTLDLSVEVK  
QLLQQMLKILELPNLGHEVHKVVHTLALAAASFVTFDLESNAINQKHLTSGRNKDFKELN  
HGISEARKELLELYETLQRKSTNKSSSESLTECIFMESDADLASSKQLVEMLSPCFHFNRSSS  
NFGHGQLPESKNVILGLNVALFLCSTKESCFHFVNCGGMDQLAYLFDHQTQNSITITLLLL  
GVIEQATRHSVGCEGFLGWWRREDENIPSGTSDGYSYLLKLLKLLQKPRHDVASLATYILHRL  
RFYEVISRYESEILSILGGLSATTGTNAASNKLRGVGSLLKLLHLVISHGPIEDPSPVAHA  
SRYFILGQTDGLVSYNATSGLIASSNCCFSDWEIDLHLLALLKDRGFLPLSAALLSTTVLHS  
EAADVVDTSLEIVSSIGSIILSLLFCRSGLVFLLHQPDLTATLIHALKGADAMNKEECVPLRY  
ASVLISKGFTCNPQEVGIIVETHLRVNVNAIDRLLSATPQSEEFLLWVLWELCGLARSDCGRQ  
ALLAMSFFSEVLSVLIEALHSVKESEPVIKNSGASPLNLAILHSAAEIVEVIVTDSTATSLSS  
WIGHAMELHKALHSSSPGSGNRKDAPTRLLEWIDAGLVYHKNAGVGLLRYAAVLASGGDA  
HLTSTNVLVSDLTVDVNDIVGESSNADINVMENLGSIIISMKSFEQVNLRDSSIAQLTTAFRI  
LAFISENPTVAAALYDEGAITVIYVVLVNC SYMLERSSNSYDYLVDGTECNSTSDLLER  
NREQCLVDLLIPSLVLLITLLQRLQEAKEQHKNTKMLTALLRLHREVSPKLAACAADLSSP  
YPDSALGFEAVCHLSVSALAYWPVYGWSPGLFHTILASVQTTSSALGPKETCSLLCLLND  
LFPEESIWRWKNGMPLLSALRSLAIGTLLGPHKERQVDWYLECGHLEKLFNQLTPHLDRI  
AQIIQHYAISALVVIQDMLRVFIIRIACQKAEQASKLLRPILSWIHDHSSDLSSLDTEAYKV  
YRCLDFLTSLLEHPYAKVLLVGEGFPQILTRVLESCFDATDSDGRQASDCRDSAKYGVALIS  
LCIPVFKSISLLCSSRTFSQYDERHEMHKFDLSLPKDCSIFINQLLKFCQVLPVGKELVSCLT  
AFRDMGSCTEGCNALLSALLNSSSSTHDELESERGNEKNVNFHFLNESEWRKSPPLCCW  
IKLLKSIDSKDHLPPYTLEAANVLSLGTGFCMGGNSLNMNSVVALKFLFGLPDDTAGIGG  
FPEDNIKYIQEFSTLLSSRIDNDEDYQTSSDIHISMHVSES VKSLLLLFQNLTAAVEVDDAI  
LYGGLSFPQNNVQVPSGIQHFQGLDGGKADDSLYSGGFEDKFSWELPETLPGRLLQTALP  
TRRKLQAADSANRSARGDNSVAEITNPTAFQRLGPSTASSGTTRRDSFRQRKPNTSRPPS  
MHVDDYVARERSVDGVSNSNVIAVPRVGSSGGRPPSIHVDEFMARQRERQNPAAAGTETA  
TQSKNAAPINGPDNEKVNKSKQLKSDLDLQGDIDIVFDGEESETDDKLPFPQDDNLQ  
LAPVIFEQSSPQSVVEETESDVNGSSQFSHMATPLASNADENAQSEFSSRMSVSRPEMSLT  
REPSVSSEKKFFEQSDDSKNAVSIKNSSGFDSASGTNSSGFSAPIYSNTPATSVQLSLDSRITP  
QNIFYPKSSAQYAGNIPVAAGSRGMYELKVLNQPPLPPMPPTILPVQSDYLSSVSGSPSL  
LQSSIPVSDSKFMRTSMPSPGTTRPPPLPSTPPPFASSPYNLASLNTSASQPALYNQSGMG  
KTELPGKSIGPTIDARLPTSAAGLASYPPLMQSLVFNRRPSIPVTPYGTSPALHQGENHPP  
GILQNPISQSSMQTIHSLNQLQKLQRPLPTQHLRPSMQSSQQLQEQVVSQTPVQMIOQSL  
PMMHQAHSIPVNPYYQPQQPEFSAAQQMQVELAQQAAPPQTGGTSQQQDSGMSLHEY  
FQSPEAIQSLLRDREKLCQLEQHPKLMQMLQEKLGQL

>GhUGA230.A04G071200.1

MGRPEPCVLFSTFVHTLDEYVDEVLFPAEPVVITACEFLEQNASSASQAVSLVGATSPPSF  
ALEVFVQSEGETRFRRLCQPFlySHSSSNVLEVEAVVTNHLVVRGSYRSLSLVIYGNTAED  
LGQFNIEFDDSSLTNLVGSADGKLEDLPLPLAFNRTFEESLSSNLVLSLPVVTLDLSVEVK  
QLLQQMLKILELPNLGHEVHKVVHTLALAAASFVTFDLESNAINQKHLTSGRNKDFKELN  
HGISEARKELLELYETLQRKSTNKSSSESLTECIFMESDADLASSKQLVEMLSPCFHFNRSSS  
NFGHGQLPESKNVILGLNVALFLCSTKESCFHFVNCGGMDQLAYLFDHQTQNSITITLLLL  
GVIEQATRHSVGCEGFLGWWRREDENIPSGTSDGYSYLLKLLKLLQKPRHDVASLATYILHRL  
RFYEVISRYESEILSILGGLSATTGTNAASNKLRGVGSLLKLLHLVISHGPIEDPSPVAHA  
SRYFILGQTDGLVSYNATSGLIASSNCCFSDWEIDLHLLALLKQDRGFLPLSAALLSTTVLH  
SEADVVDTSLEIVSSIGSIILSLLFCRSGLVFLLHQPDLTATLIHALKGADAMNKEECVPLR  
YASVLISKGFTCNPQEVGIIVETHLRVNVNAIDRLLSATPQSEEFLLWVLWELCGLARSDCGRQ  
ALLAMSFFSEVLSVLIEALHSVKESEPVIKNSGASPLNLAILHSAAEIVEVIVTDSTATSLSS  
WIGHAMELHKALHSSSPGSGNRKDAPTRLLEWIDAGLVYHKNAGVGLLRYAAVLASGGDA  
HLTSTNVLVSDLTVDVNDIVGESSNADINVMENLGSIIISMKSFEQVNLRDSSIAQLTTAFRI  
LAFISENPTVAAALYDEGAITVIYVVLVNC SYMLERSSNSYDYLVDGTECNSTSDLLER  
NREQCLVDLLIPSLVLLITLLQRLQEAKEQHKNTKMLTALLRLHREVSPKLAACAADLSSP  
YPDSALGFEAVCHLSVSALAYWPVYGWSPGLFHTILASVQTTSSALGPKETCSLLCLLND  
LFPEESIWRWKNGMPLLSALRSLAIGTLLGPHKERQVDWYLECGHLEKLFNQLTPHLDRI  
AQIIQHYAISALVVIQDMLRVFIIRIACQKAEQASKLLRPILSWIHDHSSDLSSLDTEAYKV  
YRCLDFLTSLLEHPYAKVLLVGEGFPQILTRVLESCFDATDSDGRQASDCRDSAKYGVALIS  
LCIPVFKSISLLCSSRTFSQYDERHEMHKFDLSLPKDCSIFINQLLKFCQVLPVGKELVSCLT  
AFRDMGSCTEGCNALLSALLNSSSSTHDELESERGNEKNVNFHFLNESEWRKSPPLCCW  
IKLLKSIDSKDHLPSYTLEAANVLSLGTGFCMGGNSLNMNSVVALKFLFGLPDDTAGIGG  
FPEDNIKYIQEFSTLLSSRIDNDEDYQTSSDIHISMHVSES VKSLLLLFQNLTAAVEVDDAI  
LYGGLSFPQNNVQVPSGIQHFQGLDGGKADDSLYSGGFEDKFSWELPETLPGRLLQTALP  
TRRKLQAADSANRSARGDNSVAEITNPTAFQRLGPSTASSGTTRRDSFRQRKPNTSRPPS  
MHVDDYVARERSVDGVSNSNVIAVPRVGSSGGRPPSIHVDEFMARQRERQNPAAAGTETA  
TQSKNAAPINGPDNEKVNKSKQLKSDLDLQGDIDIVFDGEESETDDKLPFPQDDNLQ  
LAPVIFEQSSPQSVVEETESDVNGSSQFSHMATPLASNADENAQSEFSSRMSVSRPEMSLT  
REPSVSSEKKIFEQSDDSKNAVSIKNSSGFDSASGTNSSGFSAPIYSNTPATSVQLSLDSRITP  
QNIFYPKSSAQYAGNIPVAAGSRGMYELKVLNQPPLPPMPPTILPVQSDYLSSVSGSPSL  
LQSSIPVSDSKFMRTSMPSPGTTRPPPLPSTPAPFASSPYNLASLNTSASQPALYNQSGMG  
KTELPGKSIGPTIDARLPTSAAGLASYPPLMQSLVFNRRPSIPVTPYGTSPALHQGENHPP



GILQNPISIPQSSMQTIHSLNQLQKLQRPLLPTQHRLRPSMQSSQOLEQVVSQTPVQMQIQSL  
PMMHQAHSIPVNPYYQPOQPEFSAAQQQMQLVLAQQQAPPQTGGTSQQQDSGMSLHEY  
FQSPEAIQSLLRDREKLCQLLEQHPKLMQMLQEKLGL

>Gobar.A04G065100.1

MGRPEPCVLFSTQTFVHHTLDEYVDEVLFPAEPVVITACEFLEQNASSASQAVSLVGATSPPSF  
ALEVVFVQSEGETRFRRLCQPFYSHSSSNVLEVEAVVTNHLVVRGSYRSLSLVIYGNTAED  
LGQFNIEFDDSSLTNLVSSADGKLEDLPLPLAFNRFTFEESLSSNLVLSLPVVTLDLVSVEVK  
QLLQQMLKILELPNLGHEVHKVVHTLALAAASFVTFDLESNAINQKHLTSGRNKDFKELN  
HGISEARKELLELYETLQRKSTNKSSSESLTECIFMESDADLASSKQLVEMLSPCFHFNRSSS  
NFGHGQLPESKNVILGLNVALFLCSTKESCFHFVNCGGMDQLAYLFDHQTQNSITITLLLL  
GVIEQATRHSVGCEGFLGWWRLEDENIPSGTSDGYSYLLKLLQKLRLHDVASLATYILHRL  
RFYEVISRYESEILSILGGLSATTKGTAASNKLRGVGSLLKLLHLVISHGPIEDPSPVAHA  
SRYFILGQTDGLVSYNATSGLIASSNCCFSDWEIDLHLLALLKQDRGFLPLSAALLSTTVLH  
SEAADVDTSLIEVSSIGSILSLLFCRSGLVFLLHQPDLTATLIHALKGADAMNKEECVPLR  
YASVLISKGFTCNPQEVGIIVETHLRVNVNAIDRLLSATPQSEEFVWVWLWELCGLARSDCGRQ  
ALLAMSFSEVLSVLIEALHSVKESEPVKNASGASPLNLAILHSAAEIVEVIVTDSTATSLSS  
WIGHAMELHKALHSSSPGNSNRKDAPTRLLEWIDAGLVYHKNAGVGLLRYAAVLASGGDA  
HLTSTNVLVSDLTVDVNDIVGESSNASDINVMENLGSIIISMKSFEVGNLDRDSSIAQLTTAFRI  
LAFISENPTVAAALYDEGAITVIYVVLVNC SYMLERSSNSYDYLVDGTECNSTSDLLER  
NREQCLVDLLIPSLVLLITLLQRLQEAKEQHKNTKLMTALLRLHREVSPKLAACAADLSSP  
YPDSALGFEAVCHLSVSALAYWPVYGWSPGLFHSILASVQTTSSLALGPKETCSLLCLLND  
LFPEESIWRWKNMGMPLLSALRSLAIGTLLGPHKERQVDWYLECGHLEKLFNQLTPHLDRI  
AQIIQHYAISALVVIQDMLRVFIIRIACQKAEQASKLLRPILSWIHDHSSDLSSLSDEAYKV  
YRCLDFLTSLLEHPYAKVLLVGEFGFPQILTRVLESCFDATDSQGRQASDCRDSAKYGVALLS  
LCIPVFKSISLLCSSRTFSQYDERHEMHKFDSLSPKDCSIFINQLLKFCQVLPVKGELVSCLT  
AFRDMGSCTEGCNALLSALLNSSSTHDELESERGNEKNVNFHFLNESEWRKSPPLLCCW  
IKLLKSIDSKDHLPPYTLEAANVLSLGTGFCMGGNSLNMNSVVALKFLFGLPDDTAGIGG  
FPEDNIKYIQEFSTLLSSRIDNDEDYQTSSDIHISMHVSES VKSLLLLFQNLTAAVEVDDAI  
LYGGLSFPQNNVQVPSGIQHFQGLDGGKADDSLYSGGFEDKFSWELPETLPGRLLQTALPT  
RRKLQAADSANRSARGDNSVAEITNPTAFQRLGPSTASSGTTRRDSFRQRKPNTSRPPSM  
HVDDYVARERSVDGVSNSNVIAPRVGSSGGRPPSIHVDEFMARQRERQNPAASTETAT  
QSKNAAPINGPDNEKVNSKQLKSDLDDDLQIDIVFDGEESETDDKLPFPQPDNDLQQL  
APVIFEQSSPQSVEETESDVNGSSQFSHMATPLASNADENAQSEFSSRMSVSRPEMSLTR  
EPVSSEKKFFEQSDSKNAVSIKNSSGFSDASGTNNSGFSAPIYNTPATSVQLSDSRITPQ  
NFYPKSSAQYAGNIPVAAGSRGMYELKVLPNQPLPPMPPPPPTILPVQSDYLSVSGSPSLL  
QSSIPVSDSKFLRTSMPSPGTTRPPPPPLSTPPPPFASSPYNLASLNTSASQPALYNQSGMGK  
TELPKGSIGPTIDARLPTSAAGLASYPPLMQSLVFNRPSPVTPYGTSPALHQGENHPPG  
ILQNPISIPQSSMQTIHSLNQLQKLQRPLLPTQHRLRPSMQSSQOLEQVVSQTPVQMQIQSLP  
MMMHQAHSIPVNPYYQPOQPEFSAAQQQMQLVLAQQQAPPQTGGTSQQQDSGMSLHEYF  
QSPEAIQSLLRDREKLCQLLEQHPKLMQMLQEKLGL

>Gobar.D04G109100.1

MGRPEPCVLFSTQTFVHHTLDEYVDEVLFPAEPVVITACEFLEQNASSASQAVSLVGATSPPSF  
ALEVVFVQSEGETRFRRLCQPFYSHSSSNVLEVEAVVTNHLVVRGSYRSLSLVIYGNTAED  
LGQFNIEFDDSSLTNLVSSADGKLEDLPLPLCAFNRFTFEESLSSNLVLSLPVVTLDLVSVEVK  
QLLQQMLKILELPNLGHEVHEVVHTLALAAASFVTFDLDSNAINQNHLTSGRNKDFKELN  
HGISEARKELLELYETLQRKSMNESSESLTECIFMESDADLASSKQLVEMLSPCFHFNRSSS  
SFGHGQLPESNNVILGLNVALFLCSAKESCFHFVNCGGMDQLAYLFDHQMNSITITLLLL  
GVIEQATRHSVGCEGFLGWWRLEDENIPSGTSDGYSYLLKLLQKLRLHDVASLATYILHRL  
RFYEVISRYESEILSKLGGLSATTKGTVASNKLRGVGSLLKLLHLVISHGPIEDPSPVAHA  
SRYFILGQTDGLVSYKATSGLIASSNCCFSDWEIDLHLLALLKDRGFLPLSAALLSTTILHSE  
AADVVDTSLEIVSSIGSILSLLFCRSGLVFLLHQPDLTATLIHALKGADAMNKEECVPLRYA  
SVLISKGFTCSPQEVGIIVETHLRVNVNAIDCLLSATPQSEEFVWVWLWELCGLARSDCGRQAL  
LAMSFFFGGIDKCSVLSVLIEALHSVKESEPVKNASGASPLNLAILHSAAEIVEVIVTDSTAT  
SLSSWIGHAMELHKALHSSSPGNSNRKDAPTRLLEWIDAGLVYHKNAGVGLLRYAAVLASG  
GDAHLTSTNVLVSDLTVDVNDIVGESSNASDINVMENLGSIIISMKSFEVGNLDRDSSIAQLTT  
AFRILAFISENPTVAAALYDEGAITVIYVVLVNC SYMLERSSNSYDYLVDGTECNSTSDLL  
LERNREQCLVDLLIPSLVLLITLLQRLQEAKEQHKNTKLMNALLRLHREVSPKLAACAAD  
LSSYPDSALGFEAVCHLSVSALAYWPVYGWSPGLFHTILASVQTTSSLALGPKETCSLLC  
LLNDLFPEESIWHWKNMGMPLLSALRSLAIGTLLGPHKERQVDWYLECGHLEKLFNQLTPH  
LDRIAQIIQHYAISALVVIQDMLRVFIIRIACQKAEQASKLLRPILSWIHDHTSDLSLSDTEA  
YKVYRCLDFLTSLLEHPYAKVLLVGEFGFPQILTRVLESCFDATDSQGRQASDCRDFAKYGF  
ALISLCIPVFKSISLLCSSLTFPQYDERHEMHKFDSLSPKDCSIFINQLLKFCQVLPVKGELVS  
CLTAFRDMGSCTEGRNALLSALLYSSSTHDELESERGNEKNVNFHFLNESEWRKSPPLLC  
CWIKLLKSIDSKDHLPPYTLEAANVLA LGTGLFCMGGNSWNMNSVVALKFLFGLPDDTT  
GIGGFPEDNIKYIQEFSTLLSSRIHNDEDYQTSSDIHISMHVSES VKSLLLLFQNLTAAVEV  
DDAILYGSLSFPQNNVQVPSGIQHFQGLDGGKADDSLYSGGFEDRFSWELPETLPGRLLQT  
ALPTRRKLQAADSANRSARGDNSVAEITNPTAFQRLGPSTASSGTTRRDSFRQRKPNTSR  
PPSMHVDDYVARERSVDGVSNSNVIAPRVGSSGGRPPSIHVDEFMARQRERQNPAAST  
ETAQSKNAAPINGPDNEKVNSKQLKSDLDDDLQIDIVFDGEESETDDKLPFPQPDND

LQQPAPTESDVNGSSQFSHMATPLASNADENAQSEFSSRMSVSHKKFFEQSDDSKNAVSIK  
NSGGFDSASGTNSSGFSAPIYSNTPATSVQLPLDSRITPQNIFYPKSSAQYAGNIPVAAGSRG  
MYEQKVLPNQPPPLPMPPPPPTILPVQSDYLSFSMRTSMPSPGTTRPPPLPSTPPPFASSPY  
NLASLNTSASQPALYNQSVMGKNELPQSGDITDALFNRPSPSIPVTPSGTSPALHQGENHP  
PSILQNPSIPQSSMQTIHSLNQLQKLQRPLQPTQHLRPSIAITAVGASCVFANPVQMQIQLSLP  
MMHQAHSIPRNNRCKLSLLQQQAPPQTGGTSQQQDSGMSLHEYFQSPEAIQLIGEHPKL  
MQMLQEKLGL

>Gobar.D04G109200.1

MLKILELPNLGHEVHEVVHTLALAAASFVTFDLDSNAINQNHLTSGRKNDFKELNHGISE  
ARKELLELYETLQRKSMNESSESLTECIFMESDADLASSKQLVEMLSPCFHFNRSSSSFGHG  
QLPESNNVILGLNVALFLCSAKESCFHFVNCGGMDQLAYLFDHQMQNSITITLTLGVLIEQ  
ATRHVSGCEGFLGWWPREDENIPSGTSDGYSYLLKLLQKPRHDVASLATYILHRLRFYE  
VISRYESEILSKLGGLSATTKGTNVASNKLRGVGSLLKLLHLVISHGPIEDPSPVAHASRYF  
ILGQTDGLVSYKATSGLIASSNCCFSDWEIDLHLLALLKDRGFLPLSAALLSTTILHSEAAD  
VVDTSLEIVSSIGSIILSLLFCRSGLVFLLHQPDLTATLIHALKGADAMNKEECVPLRYASVLI  
SKGFTCSPOEVGIIVETHLRVNAIDCLLSATPQSEEFVWLWELCGLARSDCGRQALLAM  
SFFSEVLSVLIEALHSVKESEPVIKNSGASPLNLAILHSAEIVEVIVTDSTATSLSSWIGHA  
MELHKALHSSSPGNSNRKDAPTRLLEWIDAGLVYHKNGAVGLLRYAAVLASGGDAHLTST  
NILVSDLTVDVNDIVGESSNASDINVMENLGSIIISMKSFEQVNLRDSSIAQLTTAFRILAFISE  
NPTVAAALYDEGAITVIYVVLVNC SYMLERSSNSYDYLVDGTECNSTSDLLERNREQCL  
VDLLIPSLVLLITLLQRLQEAKEQHKNTKLMNALLRLHREVSPKLAACAADLSSPYPDSA  
LGFEAVCHLSVSALAYWPVYGWSPGLFHTILASVQTTSSLALGPKETCSLLCLLNDLFPEESI  
WHWKNGMPLLSALRSLAIGTLLGPHKERQVDWYLECGHLEKLFNQLTPHLDRIAQIIQHY  
AISALVVIQDMLRVFIIRIACQKAEQASKLLRPILSWIHDHTSDLSLSDTEAYKVYRCLDFL  
TSLEHPYAKVLLVGEGFPQILTRVLESCFDATDSDGRQASDCRDFAKYGFALISLCIPVFKS  
ISLLCSSLTFPQYDERHEMHKFDLSLSPKDCSIFINQLLKFCQVLPVGKELVSCLTAFRDMGS  
CTEGRNALLSALLYSSSSTHDELESERGNEKNVNFHFLNESEWRKSPPLCCWIKLLKSID  
SKDHLPPYTLEAANVLAALGTLGFCMGGNSWNMNSVVALKFLFGLPDDTTGIGGFEDNIK  
YIQQFSTLLSSRIHNDEDYQTSSDIHSMHQVSESVKSLLLLFQNLTAAVEVDDAILYGSLSF  
PQNNVQVPSGIQHFQGLDGKADDSLYSGGFEDRFSWELPETLPGRLLQTALPTRRKLQA  
ADSANRSARGDNSVAEITNPTAFQRLGPSTASSGTTRRDSFRQRKPNTSRPPSMHVDDYV  
ARERSVDGVSNNSNVIAPRVGSSGGRPPSIHVDEFMARQRERQNPAASGTETAAQSKNAA  
PINGPDNEKNVNSKQLKSDLDDDLQGDIVFDGEESETDDKLFPQPDNDLQQPAPVIFEQ  
SSPQSVVEETESDVNGSSQFSHMATPLASNADENAQSEFSSRMSVSRPEMSLTREPSVSSD  
KKFFEQSDDSKNAVSIKNSGGFDSASGTNSSGFSAPIYSNTPATSVQLPLDSRITPQNIFYPKS  
SAQYAGNIPVAAGSRGMYEQKVLPNQPPPLPMPPPPPTILPVQSDYLSVSGSPSLLQSSIPVS  
DSKFMRTSMPSPGTTRPPPLPSTPPPFASSPYNLASLNTSASQPALYNQSVMGKTELPGG  
SIGPTIDARLPTSAAGLASYPPLMQSIVFNRPSPSIPVTPYGTSPALHQGENHPPSILQNPSIP  
QSSMQTIHSLNQLQKLQRPLQPTQHLRPSMQSSQQLQVVSQTPVQMQIQLSLPMMHQA  
HISPVNPYYLPQQPEFSAQQQMQLVLAQQQAPPQTGGTSQQQDSGMSLHEYFQSPEAIQ  
SLLRDREKLCQLEQHPKLMQMLQEKLGL

>Gohir.D04G091700.1

MLKILELPNLGHEVHEVVHTLALAAASFVTFDLDSNAINQKHLTSGRKNDFKELNHGISE  
AKKELLELYETLQRKSMNESSESLTECIFMESDADLASSKQLVEMLSPCFHFNRSSSSFGH  
GQLPESNNVILGLNVALFLCSAKESCFHFVNCGGMDQLAYLFDHQMQNSITITLTLGVLIEQ  
QATRHVSGCEGFLGWWPREDENIPSGTSDGYSYLLKLLQKPRHDVASLATYILHRLRFYE  
EVISRYESEILSILGGLSATTKGTNVASNKLRGVGSLLKLLHLVISHGPIEDPSPVAHASRY  
FILGQTDGLVSHKATSGLIASSNCCFSDWEIDLHLLALLKDRGFLPLSAALLSTTILHSEAA  
DVVDTSLVIVSSIGSIILSLLFCRSGLVFLLHQPDLTATLIHALKGADAMNKEECVPLRYASV  
LISKGFTCSPOEVGIIVETHLRVNAIDCLLSATPQSEEFVWLWELCGLARSDCGRQALLA  
MSFFSEVLSVLIEALHSVKESEPVIKNSGASPLNLAILHSAEIVEVIVTDSTATSLSSWIGH  
AMELHKALHSSSPGNSNRKDAPTRLLEWIDAGLVYHKNGAVGLLRYAAVLASGGDAHLTS  
TNILVSDLTVDVNDIVGESSNASDINVMENLGSIIISMKSFEQVNLRDSSIAQLTTAFRILAFIS  
ENPTVAAALYDEGAITVIYVVLVNC SYMLERSSNSYDYLVDGTECNSTSDLLERNREQCL  
LVDLLIPSLVLLITLLQRLQEAKEQHKNTKLMNALLRLHREVSPKLAACAADLSSPYPDSA  
LGFEAVCHLSVSALAYWPVYGWSPGLFHTILASVQTTSSLALGPKETCSLLCLLNDLFPEE  
SIWHWKNGMPLLSALRSLAIGTLLGPHKERQVDWYLECGHLEKLFNQLTPHLDRIAQIIQ  
HYAISALVVIQDMLRVFIIRIACQKAEQASKLLRPILSWIHDHTSDLSLSDTEAYKVYRCL  
DFLTSLEHPYAKVLLVGEGFPQILTRVLESCFDATDSDGRQASDCRDFAKYGFALISLCIPV  
FKSISLLCSSLTFPQYDERHEMHKFDLSLSPKDCSIFINQLLKFCQVLPVGKELVSCLTAFRD  
MGSCTEGRNALLSALLYSSSSTHDELESERGNEKNVNFHFLNESEWRKSPPLCCWIKLL  
KSIDSKDHLPPYTLEAANVLAALGTLGFCMGGNSWNMNSVVALKFLFGLPDDTTGIGGFPE  
DNIKYIQFSTLLSSRIHNDEDYQTSSDIHSMHQVSESVKSLLLLFQNLTAAVEVDDAILYG  
SLSPQNNVQVPSGIQHFQGLDGKADDSLYSGGFEDRFSWELPETLPGRLLQTALPTRRKL  
LQAADSANRSARGDNSVAEITNPTAFQRLGPSTASSGTTRRDSFRQRKPNTSRPPSMHVDD  
DYVARERSVDGVSNNSNVIAPRVGSSGGRPPSIHVDEFMARQRERQNPAASGTETAAQSK  
NAAPINGPDNEKNVNSKQLKSDLDDDLQGDIVFDGEESETDDKLFPQPDNDLQQPAPVI  
FEQSSPQSVVEETESDVNGSSQFSHMATPLASNADENAQSEFSSRMSVSRPEMSLTREPSV  
SSDKKFFEQSDDSKNAVSIKNSGGFDSASGTNSSGFSAPIYSNTPATSVQLPLDSRITPQNIFY

PKSSAQYAGNIPVAAGSRGMYEQKVLPNQPLPPMPPPTILPVQSDYLSSVSGSPSLLQSSI  
PVSDSKFMRTSMPSPSGTTRPPPSLPSTPPPFASSPYNLAASLNTSASQPALYNQSVMGKTEL  
PQGSIGPTIDARLPTSAAGLASYPPLMQSLVFNRPSPVTPYGTSPALHQGENHPPSILQ  
NPSPQSSMQTIHSLNQLQKLQRPLOPTQHLRPSMQSSQQLQEQVSSQTPVQMQIQSLPM  
MHAHISPVNPPYLPQQPEFSAAQQQMVELAQQAAPPQTGGTSQQQDSGMSLHEYFQS  
PEAIQSLLRDREKLCQLLEQHPKLMQMLQEKLQGL

>Gohir.A04G053650.1

MLKILELPNLGHEVHKVVHTLALAAASFVTFDLESNAINQKHLTSGRKNDFKELNHGISE  
ARKELLELYETLQRKSTNKSSSESLTECIFMESDADLASSKQLVEMLSPCFHFNRSSSNFGHG  
QLPESKNVILGLNVALFLCSTKESCFHFVNCGGMDQLAYLFDHQTONSITITLLLLGVIEQA  
TRHSVGCCEGFLGWWPREDENIPSGTSDGYSYLLKLLQKPRHDVASLATYILHRLRFYEVI  
SRYESEILSILGGLSATTKGNTAASNKLRGVGSLLKKLLHLVISHGPIEDPSPVAHASRYFIL  
GQTDGLVSYNATSGLIASSNCCFSDWEIDLHLLALLKDRGFLPLSAALLSTTVLHSEAADV  
VDTSLIVSSIGSILSLLFCRSGLVFLLHQPDLTATLIHALKGADAMNKEECVPLRYASVLIS  
KGFTCNPQEVGHIIVETHLRVNAIDRLLSATPQSEEFWVWLWELCGLARSDCGRQALLAMS  
FFSEVLSVLIEALHSVKESSEPVKNSGASPLNLAILHSAAEIVEVIVTDSTATSLSSWIGHAM  
ELHKALHSSSPGSGNRKDAPTRLLEWIDAGLVYHKNGAVGLLRYAAVLASGGDAHLTSTNI  
LVSDLTDDVVDNIVGESSNASDINVMENLGSIIISMKSFEFVNLRDSSIAQLTTAFRILAFISEN  
PTVAAALYDEGAITVIYVVLVNC SYMLERSSNSYDYLVDGTECNSTSDLLERNREQCLV  
DLLIPSLVLLITLLQRLQEAKEQHKNTKLMTALLRLHREVSPKLAACAADLSSPYPDSALG  
FEAVCHLSVSALAYWPVYGWSPGLFHTILASVQTTSSALGPKETCSLLCLLNDLFPEESI  
WRWKNGMPLLSALRSLAIGTLLGPHKERQVDWYLECGHLEKLFNQTPHLDRIAQIIQHY  
AISALVVIQDMLRVFIIRIACQKAEQASKLLRPILSWIHDHSSDLSSLSDEAYKVYRCLDFL  
TSLEHPYAKVLLVGEFQPILTRVLESCFDTSDGRQASDCRDSAKYGVALLISLCIPVFK  
SISLLCSSRTFSQYDERHEMHKFDLSPKDCSIFINQLLKFCQVLPVGKELVSCLTAFRDMG  
SCTEGCNALLSALLNSSSTHDELESERGNEKNVNFHFLNESEWRKSPPLCCWIKLLKSI  
DSKDHLPSYTLAANVLSLGTGFCMGGNSLNMNSVVALKFLFGLPDDTAGIGGFPEPDI  
KYIQEFSTLLSSRIDNDEDYQTSSDIHSMHQVSESVKSLLLLFQNLTAAVEVDDAILYGGLS  
FPQNNVQVPVSGIQHFQGLDQKADDSLYSGGFEDKFSWELPETLPGRLLQ TALPTRRKLQ  
AADSANRSARGDNSVAEITNPTAFQRLGPSTASSGTTRRDSFRQRKPNTSRPPSMHVDD  
YVARERSVDGVSNSNVIAPVRVGSSGGRPPSIHVDEFMARQRERQNPAAAGTETATQSKNA  
APINGPDNEKVNKSKQLKSDLDLQIDIVFDGEESETDDKLPFPQPDNDLQQLAPVIFE  
QSSPQSVVEETESDVNGSSQFSHMAPLASNADENAQSEFSSRMSVSRPEMSLTREPSVSS  
EKKIFEQSDDSKNAVSINKSSGFDSASGTNNSGFSAPIYSNTPATSVQLSDSRITPQNFPYK  
SSAQYAGNIPVAAGSRGMYELKVLPNQPLPPMPPPTILPVQSDYLSSVSGSPSLLQSSIPV  
SDSKFMRTSMPSPSGTTRPPPSLPSTPAPFASSPYNLAASLNTSASQPALYNQSGMGKTELPK  
GSIGPTIDARLPTSAAGLASYPPLMQSLVFNRPSPVTPYGTSPALHQGENHPPGILQNP  
SIPQSSMQTIHSLNQLQKLQRPPLPTQHLRPSMQSSQQLQEQVSSQTPVQMQIQSLPMMH  
QAHISPVNPPYLPQQPEFSAAQQQMVELAQQAAPPQTGGTSQQQDSGMSLHEYFQSPE  
AIQSLLRDREKLCQLLEQHPKLMQMLQEKLQGL

>Potri.016G069100.1

MGRPEPSVLFSQTFVHPQLDEYVDEVLF AEPIVITACEFLEQNASSASQAVSVLGATSPPSF  
ALEVFKCEGETRFRRLCQPFYSHSSSHVLEVEAVVTNHLVVRGSYRSLSLVIYGNTAED  
LGQFSIEFDDSSLTNLVSSAEGKLEDLPLALHSTNRTVEDSLSSLNVL SLPVAASHISAEVKQ  
FLQILKLELPNLSDSVHRVLTTVKAVCSFVTRDLCCETVNQKHIKMC GSKNIEEFHVI  
NEARNELLQVLGQVLGDESAELLADCTFLESEADLTSKQLVDMLSQYFSFERNSTNVGA  
CQLSQNKSVILGLSLALLCSGRESCHFVSSGGMEQLAHIFSNEVQNSSAII LSLGVVEQ  
ATRHPIGCEGFLGWWPREDENIPSGTSGYSQLLKLVLQRPQHDVASLATYVLHRLRFYE  
VVSRYEFSVLSALGGLSALGRVTSVTSAMLSAKSQLKMLLKLINLRGP IEDPSIAASASRS  
LIIGQTEGLLSYKATSNLVGSSHCCFSNWDIDSHLLALLKERGF LPLSAALLSSPILRSEAVD  
AMDTFVDIASTIGAILLSLLMCRSGLIFLLNYPELCTTLIDALRGVGGMNREECVPLRYASV  
LLSKGFVCSPHEVGIVETHLRVNAIDRLLISTPHPEEFLWVWLWELCGLSRSDCGRQALL  
VLGYFPEAISILIEALHSVKESSEPVASGASPINLAIFHSAAEIFEVIVTDSTASSLDSWIGHAM  
ELHKALHSSSPGSGNRKDTPTLLEWFDAGVYHKNGAIGLLRYSAVLASGGDAHLTSTSI L  
VADLTDVEQVVGDALGGS DINVMDNLGKLISDKSFEDNPLRDSSITQMTTAIRILAFVSEN  
STVAAALYDEGALIVIYAILIKCSLMLERSSNSYDYLVDGTERNSTSDLLERNREQSLVD  
LLVPTLVLLINLLQKLQEAKEQHRNTKLMNALLRLHREVSPKLAASAADLSSPYPDSALG  
FGAVCHLVVSALTCPWLYGWTPGLFHSLLANVQATSLALGPKETCSLLCLLNDLFPEEG  
VWLWKNGMPLMSALRKLAVGTLLGPQKEKQVDWYLETSHREKLLNQ LTPHLDKIAQIIIE  
HYAISALVVIQDMLRVFIIRIACQKIEYASLLLQPI LCCIRNHLSDLTSPSEIDAYKVYRYLDF  
LASILEHPCAKELLLEEGLAEMLTQVLERCLVAIGSDGKQISDSKISAKSGFTLISWCCPVFK  
SFSLLCVPRTPLPYPVRHDLHSSASLSAKDCSLILPYLLKSCQVLPVGKELLSCLAFFKDLG  
SCNEGQSACVTTLHINTSIEEHESGKGQERNNGNYNLDDIEWRKHPPLSCWIRNLLSVDS  
KDDANELLQALCAEAVTLLSIGALCFCLDSKCNLNLGVAAIKKLF GIHDDMDGTDSSPENIGFIL  
EMITLLSSKLNDDDYLATDMRESLYQASDSAKSLLLLLQKPTG SVTIDDIMSSEGIQSLPSN  
ELLVHSRINQMADGTAEKFDGYLYLGGLGDKFLWECPETLPDR LSONPSMKRKLASLDGS  
GKRVKGETSVAEATVQNAFSRGMGSS TAPSGPTRRDTFRQRKPNTSRPPSMHVDDYVARE  
RSVDGVSNSNVIAPVRVGSTGGRPPSIHVDEFMARQRERQNPMAVAVGEP SAKVK NATPA  
NDVDKEKDNKSKQLKTVLDDDLQIDIVFDGEESESDDKLPFPQPDNDLEQLAPVIGDQS

SPHSIVEETESDVNGNNOFSHSHTPLASHVDENTQSEFSSRMSVSRPEMPLTREPSVSSDKK  
FFEQPDDAKNTIKTSAGFDSISAASTSGFPHQIPVDSRMPPQNFYMKNSLOHSSGSRGLYD  
SKIPLNQPLPPMPPAMSSMIPQNHDPGPTQSSPYVNSGTEVQPPLPAAFOVQSDYLSAFG  
SNPSTSPIDPRLGNLSVSGAGLTSYMPPLMPPMVFSRPATIPVTPYGSISPTQQQGESPVL  
QNLSIPQPSVQSIHQLQPLQPLRRPPQPPQHLWSLAQSSQQLQGGSLQSSIQMQGHQLQ  
MLQQQQLPSVHAHYQAQQQELSQSRQQLVEHAQPHVIHQQGDVSSQQQQLGMSLQEY  
FKDPKAITSLSNKEELCRLLEQNPKLMQMLQERLGQQ

>V.v201s0026g00760.1

MGRPEPCVLFQAQTFVHPQLDEYVDEVIFAEPVVITSCEFLEQNASSVSPVITLLGATSPPSFA  
LEVVFQSEGETRFRRLCQPFYLSHSSSNVLEVEAVVTNHLVVRGSYRSLSLVIYGNTAEDL  
GQYNIEFDLDSSLTNVVCSSSEGLDDLPALHSKNLTIEESSLKLALSLPVAASDISIEIKQF  
LQLMFKILELTNLGDVHKVLDTVVSAASSYSAHDLHYAAVNQKKFTQSTNNSNEESHFV  
LDAACKELLDLYKTLQDESGNSSVELLEECFLESEIDLASSKELMDMLIQHFLFKRNFSL  
VGHYHLSQKKKVILVLSVALFLCSAKESCFQFVNGGGMEQLACVFSDDLQNSTAITLML  
GVVEQATRYSIGCEGLGWWPREDNDVPSGISEGYRLLKLLLEKQRHDIASLATYALHRL  
RFYEVVSRYECAVLSVLGGLSTVGRVTGATLDMLISAKVQLKKLLKLINSRGPIEDPSPVA  
CASRSLILGQTEGLLSYKATSNLIGLSNCCFSSRDIDHLLSLVKERGFLPLSAALLSSSILRS  
EVGHAMDIFVDITSSIEAIIISLLFCRSGLIFLLHPELSATVILALRGVDDFHKEDCAPLRYA  
SILISKGFFCRPREVGLVVMHLRVVNAVDRLSSSTPQSEEFLLVWLWELCGLSRSDSGRQA  
LLALGHFPEAVLVLMEALHSVKELEPVTTTGTSPNLAIHFSASEIFEVLVDSTASSLASWI  
GHAMELHKALHSSSPGSNRKDAPTRLLEWIDAGVVFHKNVGTGLLRYAAVLASGGDAHL  
TSTSILGSDSMDVENAVGDSSSGSDTNVIENLGKLISEKSFVGVTLRDSSVAQLTTAFRILAF  
ISENSAVAAALYDEGAIIIIYAVLDCRFMLERSNNYDYLVDDEGTECNSTSDLLERSREKS  
LVDLLIPLLVLLITLLKKLQEAQEQHRNTKLMNALLRLHREVSPKLAACAADLSSSYPDAA  
LGFGAVCNLLVSALACWPIYGWTPGLFHSLLASVQATSSLALGPKETCSLLCILNDFPEE  
GVWLWKNGMPLLSAVRTLAVGTLLGPQKEREVNWYHLPGHPEVLLNQLTPQLDKISQVI  
LHYAMTSLVVIQDMLRVFIIRIACQKADNASLLLPIMSWIRMRLSESSCQTDVDAYKIYR  
LLDFLACLLEHPCAKPLLLKEGAIQMLIKALERCVDATESDGKQLSDGRNSAKCSLTAFSW  
CLPLCKSLSLICGSHMSRHYIGNYAKNDFEHLSSSEDCSLILPYLLKLCQILPVGRELLACT  
VFKELGSCNEGQNALMAVFLRARSSDEELELEKHERGGNYNVLNEYEWMKLPPLCC  
WTKLLRSVDPDGFAPAYAEAVGALSGLALRFCMDGKSLNLDVRFAMKFLFGLPHDLSGM  
DDFPEENIRYIQLTTLGSKVTDDEYSAKSDMKTTLCRASDYAKSLLMLQNPAGSLDLG  
DIISSEDVPLSPNDVILSSRIHQMIDNSAEKVEDYCCLGLEDKFLWECPETLPDRLLQTTLP  
AKRKMSLEGPSRRARGDNSPAETVAQGAFSRALGPPSASSGPSRRDTFRLRKPNSTRPPS  
MHVDDYVARERNVDGVSNSNVIAVQRIGTTGGRPPSIHVDEFMARQRERQNPVVSAGVE  
VAAQAKNAAPENDADMEKFNKSRQIKADLDDDLQGIDIVFDGEESEPDEKLPPFPQDDNL  
QQPASVIVEQSSPRIVEETESDVNENSQFSRLGTPLALNVNENPESEFSSRMSVSRPERPLT  
REPSVSSEKKYFEQSDDMKNVIPAMTPSRYDSAGAAISSGFPASTYGKASVSSVPLMVDSR  
MVQPNFYLVKNSSQAGNMALATGSQGLYDQKFMNLQPPPLPPMPPPTISPIQAPDALS  
QSSSFVNTATDVQPPPLPTAFQVQSEYLSAFTNSSTSLASSLMPDSKYSRASLSSPSGSARPP  
PPLPTPPPFSAAPFTLASLKVSVSSSSVYNQTSAGATDLPQISGASLTDARLGNLSASGTRL  
SSYPPPLVPPLVFSRPASIPVSIYGSTTTQQQGENPSNTIQNPPIQLSIQSIQSFAQLQPLQPPQ  
LPRPPQPPQHLRPPVQPSQQPEQGVSLQSPIQLPVQPLQMLQQPQVSPLHVYYQQQQQE  
NFPHVQQQQQVEHGQHVLRQQGDSSSQLEQDSGMSLQQYFSSPEAIQSLLCDRDKLCQ  
LLEQHPKLMQMLQERLGQL

>Phvul.007G267500.1

MGRPEPCVLFQSQTFVHPHLDEYVDEVIFSEPIVITACEFLEQSASSVAQAVSLVGATSPPSFAI  
EVFVHCEGETRFRRLCQPFYLSQSSSNVLEVEAVVTSHLVVRGSYRSLSLVIYGNTAEDLG  
QFNIDIDDNALTDLVDSTEGKLEDLPALHSTNFTIRDSRSSLSVLSIPVPATNIALEVNLFQ  
LMLKFLEFSDPGDAGHKIVNSVSAISSYISSDICESISGRYQMWKRSENLEELHGAINEAR  
KELLEVIKVLHRKSRSDSSECSSEANYLEMDVEMLDKTLVDMFNQYFNFQIHSSCTGD  
HCLSQREHALLGLSMAYLLCSGRESGFQFVSSGGMEQLAVFFSKDGQNSTTIMLLLLGVIE  
RATRYSVGCEAFLGWWPREDSEIPSGISEGYSLVKLILSKPRHDVASLATYLLHRLRFYEI  
ASRYESAVLSVLENISTVGRVTDVTLNMLSSAEILLRKLNLINSRGPIEDPSPARASRLIT  
GQTDGLLSYKTTSSLISSSSCCFSDCDIDSHLLGLLKERGFLSLSTALLSSSILRTGTGHVME  
LFMDVTSSVEAVILSFLFSRSGLIFLLQDPELSSTLILALRGGHRGNKENCIPLOYASILISK  
FFCSPLEIGMIEMHLKMANATDSLSSNPQSEEFLLVWVWELSTLSRSDCGRRALLALGNF  
PEAVSILIEALSSIKESVSGKNSGSSAVNLTIFHSAEIIIEAIVTDSASSSLGSWIGHAMELH  
RALHFSSPGSNRKDAPSRLLEWIDAGVVYHKGHGIGLMRYAAVLASGGDAQLTSTSILVS  
DLTDVENVVGESSGSDINV MENLGKFISEKSFVGVTLRDSSLAQLTTALRILSFISENPTVA  
ATLYNEGAVIVIIYAILVNCRFMLERSNNYDYLVDDEGTECNSTSDLLERNRELNIVDLLVP  
SLVLLITLLQKLQEAQEQHRNTKLMNALLRLHREISPKLAACAADLSSRYPDYAIYGAVC  
HLIASALAFWVPVHGWSPGLFNTLLASVQSSSLTLGPKETCSLLYLLSDLPDEEDYIWLWTS  
GMPLLTTRRMLGIGTILGPQKERHVNWYLESGLHLEKLLGQLVPHLDKIAEIIQNYAISALG  
VVQDLLRVFVIRISCQNPKYASILIKPVLSSIVHLASESSFPSDTPDAYKILRLDLFVSLLEHP  
LGKVLLREGTLQILTLLDRCFVITDDGKQTPDRSSATCSFNIYSWCLPIFKFIMLLFHSET  
SHHYPRRHDFKNFEKLSDEDSALILQYILKSCQVLPVGKELLACLTAFKDLASCDEGQMA  
FGATHLGINSHAYELDPKGRDNVNYSVSSVAEWRKCPPLLSCWMKLLKSIDDTKEGLST

CAIEAVYALSVGSIQFCMNGDSLNSDRVVALKYLFGISDDMTRSVGFPEENINYILEFSALL  
SSKAAMDDCLVTSFSQIPLYQVSESVKSLSLILERPAGSMKLEDAVLQPQYDVLGFSNRHQL  
LENSVEKIDDLHYVGGGLGDKFLWECPEILPDRLTQTNLAAKRKLPSMDGPPVRRARGESFQ  
GDISSQAFNRGPAQSAVSSGTRRDAFRHRKPNTRSPPSMHVDDYVAREKIVEGVTNVIS  
VPRAGSTGGRPPSIHVDEFMARQRERQNPSTATVVGAVGHLKNASPVKPADMEKLNKSK  
QLKTDLDDDLQGIDIVFDGEESDPDDKLLFPQLDDNIQPPAPVIVEQSSPHSIVEETGSDVV  
DSGQFSQMGTPLRSNVDNAQSEFSSKISGRPDMSLTRESSVSSDRKYVEQADDLKNVQ  
VKPSGRYDSAASNTSFPMSLYNNPSSSMQLPADSRMVSONYLLKNSPQHGGIATGSQGLY  
DQRFLPNQPPLPPMPPPTVSPHSHATDSVPSQSTSFVNPQAGTQRPVAFQVQLDYPSPFNN  
GTTATALLASSIPMQDSKYSRTSVSSPGGNRVAPPLPPTPPPFVSSQYNLSSVKSSGSQPSIY  
NQTSMTTELSSHSSIASGARLSSYPNPPMGFSRASMPLSMFGNAPNQQTENQPNILQN  
ISVPPASFQSMHSVTQLQPLQPPQLTRPPQPPQLRPPVQALQQLEQGMVQSNQVHQINM  
LQQSQVPSMQTYTYQTQQQQFSHEQLQPHVEYTQQPADGQSQQQPDAGLSLHEYFKSPEA  
IQSLLRDRDKLCQLEQHPKLMQMLQERLGQL

>Glyma.02G195600.1

MGRPEPCVLFQNFVPHPLDEYVDEVFMFSEPIVITACEFLEQSSASSVAQAVTLVGATSPPSF  
AIEVFVHCEGETRFRRLCQPFLYSHSSSNVLEVEAVVTSHLVVRGSYRSLSLVIYGNATAEDL  
GQFNIDIDNALTDLVDSTEGKLEDLPPALRSTSFTIDDSRSLNVLSIPVPATDISVEVNLFL  
GLMLKFLEFSDLGDAGHKIVNTVSAISSYISSDICESIGGRYQMRKRSENLEELHIVVDEA  
RKELLEVEYKVLHKKFRSESSECSDDAYYLEMDAEMLDSTLVDMFNQYFHFQORNSSCIGD  
HCLSQSEHALLGLSMAYLLCSGRKSGFQFVSSGMEQLALFFSKDGQNSTTIMLLLLGVV  
ERATRYSVGCEAFLGWWPREDDSIPSSISEGYSHLLKLILSKPRHDVASLATYLLHRLRFYE  
IASRYESAVALSVLGNISTVGRVTDVTLNMLSSSEILLRKLKLINSRGPIEDPSPACASRLI  
TGQTDGLLSYKTTSSLISSSSCCFSDCDIDSHLLGLLKERGFSLSTALLSSSKLRMESGHA  
MEIFMDVTSSIEAVILSFLFCRSGLIFLLQDPELSSTLIHALRSGHRGNKEDCIPLRYASILISK  
GFFCSPLEIGMIIEMHLKMVNAIDSLSSNPQSEEFWVWVWELSTLSRSDCGRQALLALGN  
FPEAVSILIEALSSFKESSESVGKNSGSSAVNLTIFHSAAEIIEAIVTDSTASSLGSWIGHALELH  
RALHFSSPGSNRKDAPSRLEWIDAGVVYHKQGGIGLLRYAAVLASGGDAQLTTLVLSDDL  
TDVENVVGESSSGSDINVMENLGKFISEKSFQVTLRDSSLAQLTTALRILSFISENPTVAAT  
LYDEGAVIVIYAILVNCRFMLERSSNNYDYLVDGTECNATSDLLERNRELNIVDLLVPSL  
VLLITLLQKLQEAKEQHRNTKLMNALLRLHSEISPKLAACADDLSSPYPDYAIGYGAVCHL  
VASALAFWPVHGWSPGLFHTLLASVQSTSLTLGPKETCSLLYLLIDLFPEDIWLWTSGM  
PLLTARRMLAVGNILGPQKERHVNWYLESQHKEQLVGLAPHLDKIAEILHYAVSALVVI  
QDLLRVFVIRIACQNAKYASMLIKPALSSVHIVHSESSCPSDTDAYKVLRLDLFLVSLLEHP  
LGKGLLLREGTLQILTKVLDRCFVIVDVGDKQIHDRSSAKCSFNFFSWCLPIFNFMMLLFR  
SEISRHYPRRDDFKNFEKLSDEDCALILRYLLKSCQVLPVGKELLACLTAFKELASCGEGQ  
MAFGATHFGIHSHELEPRKDDRNVNYNVSSVAEWIKCPPLLSCWMKLFRRSIDTKEGLS  
AYAIEAAYALSVGSLQFCMDGDSLNSDRVVALKYLFGISNDMTRSDGPFPEENINYILEFSAL  
LSSKASMDCLVNSQSQIPLYQVSESVKSLSLVLQRPVDSMKLEDDVLHQNVEVLVFSKTH  
QLENSVEKIDDLHYVGGGLGDKFLWECPEILPDRLTQTTLAAKRKLPSMDGPPVRRARGES  
FQADMSSQNAFNRGVAQSAVSSGPTRRDAFRQRKPNTRSPPSMHVDDYVAREKNVEGVT  
NVISVPRAGSTGGRPPSIHVDEFMARQRERHNPSTATVVGAVGHPKDASPVKPTDTEKLN  
KSKQLKTDLYDDLQGIDIVFDGEESDPDDKLPFPQLDDDLQPPAPVIEQSSPHSIVEETESD  
VVDSSQFSQMGTPLGSDNIDENGQTEFSSKMSGSRPDMSLTRESSVSSDRKYVEQADDTKN  
VQARPSGRYDSVSSNTSFPMSLYNNPSTSMQSPADSRMVSONYLLKNSPQHAGIASGSQ  
LYDQRFLLTNQPPLPPMPPPTVSPVISHATDSVPHGSSPFVNSLAGTQRPVAFQVRSDYSSPF  
INGSTAASSVPVPSDKYSRTSVSSPGGPSRVAPPLPPTPPPFASNQYNLPSVKTSASQPSMYN  
QTSIGATELSQASISSSGARLSSYPNPPMMSAGFSRSASMPMTMFGNSPNQQQTENQPSILO  
SISVPPASFQSMHPVTQLQPLQPPQLPRPPQPPQLRPPVHALQQLEQGMVQSNVQVHHQ  
LQMLQPPQVPSMQTYTYQTQQQQFSHEQQQVEYTQQPGNSLSQQQQDAAMSLHEYFKSP  
EAIQSLSDRDKLCQLEQHPKLMQMLQEKLGQL

>Glyma.10G082100.1

MGRPEPCVLFQNFVHHTLDEYVDEVFMFSEPIVITACEFLEQTASSAAQAVTLVGATSPPSF  
AIEVFVHCEGETRFRRLCQPFLYSHSSSNVLEVEAVVTSHLVVRGSYRSLSLVIYGNATAEDL  
GQFNIDIDNALTDLVDSTEGKLEDLPPALRSTNFTIDDSRSSLRVLSIPVPATDISVEVNLFL  
QLMLKILEFSELGDAGHKIVDPVVSATSYISSDICESIGGRYQMQRSENLEELHVSVNNEG  
RKELLEVEYKVLHKKFRSGSSECSPDANYLEMDAEMLDSTLVDMFNQYFHFQORHSSCIG  
DHCLSQSEHALLILSMAYLLCSGRESGFQFVSSGMEQLAVFFSKDWQNSTTIMLLLLGVV  
VERATRYSVGCEAFLGWWPREDENIPSSISEGYSHLLKLILSKPRHDVASLATYLLHRLRFY  
EIASRYESAVALSVLGNIGTVGRVTDVTLNMLSSAEILLRKLKLINSRGPIEDPSPACASRS  
LITGQTDGLLSYKTTSSLISSSSCCFSDCDIDSHLLGLLKERGFSLSTALLSSSILRVESGHV  
MEIFMDVTSSIEAVILSFLFCRSGLILLQDPELSSTLIRALRGHHRGNKEDCIPLRYASIFISK  
GFFCSPPEIGMIIHLKMVNVDLSLNPQSEEFWVWVWELSMLSRSDCGRQALLALGN  
FPEAVSFLIEALSSIKESSESVGKSSGSSAVNLTIFHSAAEIIEAIVTDSTASSLGSWIGHALELH  
RALNFSSPGSNRKDAPSRLEWIDAGVVVHKKQGGIGLLRYAAVLASGGDAQLTSLVLSDDL  
DVETVVGESSSCSDINVMENLGKFISEKSFQVTLRDSSLAQLTTALRILSFISENPTVAATL  
YDEGAVIVIYAVLVNCRFMLERSSNNYDYLVDGTECNATSDLLERNRELNIVDLLVPSL  
VLLITLLKKLQEAKEQHRNTKLMNALLRLHREISPKLAACADDFSSPYPDYAIGYGAVCHL  
VASALAFWPVHGWSPGLFHTLLASVQSTSLTLGPKETCSLLYLLIDLFPEDIWLWTSGM

PLLTARRMLAVGNILGPQKEKHINWYLESGHQEKLVGQLAPHLDKIAEIIQHYAVSALVVI  
QDLLCVFVIRIACHNAKYASMLIEPVLSSVVHHVSESSCPSDTDAYKVLRLDFLASLLEH  
PLGKGLLREGTLQMLTKVLDRCFVIVDVGDKQIHDRSSAKCSFNFFSWCLPIFKFIMLLF  
HSETSRHYPRRHDFKNFEKLSDEDCALIRYLLKSCQVLPVGKELLACLAFKELASCEGEG  
QMAFGATHFGIHSASHALEPRKDDRNVNYSVSSVAEWIKCPPLLSCWMKLLRSIDTKEGLS  
TYAIEAAYALSVGSLQFCMNGDSLNSDRVVALKYLFGISDDMTRS VVFPEENINYIQEFSAL  
LSSKASMDCLVTSHSQIPYQVSESVKSLSLVLERPVDSMKLEDVVLHQNEVLVFSKTHQ  
LLENSVEKIDDLHYVGGGLGDKFLWECPETLPDRLTQTNLA AKRKLPSMDGPPVRRARGESF  
QADMSSQNVFSRGVAQSAVSSGPTRDAFRQRKPNTSRPPSMHVDDYVARERNVEGVN  
VISVPRAGSTGGRPPSIHVDEFMARQRRERQNP SATVVG EAVGHLKNASPVKPTDTEKLNK  
SKQLKTDLDDDLQGDIVFDGEGSDPDDKLPFPQLDDNLQOPAPAIVEQSSPHSIVEETESD  
VVDSSQFSQMGTPLGSLNIDEN AQSEFSSKMSGSRPDMSLTRESSVSSDRKSAEHLDDSKN  
VQARPSGRYDSVASNTSFPMSLYNNPSASMOSPADSRMVSONYLLKTSPQHGGIASGSQG  
LYDQRFMPNQPLPPMPPTVLPVISHASDSVPGHSSPYVNSPAGTQRPVAFQVQLDYSSP  
FNNGSTAASSVPVPSKYSRTSVSSPGGPNRIAPPLPTPPPFASSQYNLPIVKASASQPSMY  
NQTSGATELSQASIASSGARLSSYPNPSMMSVGFSRPASMPLTMFGNSLQQOTENQPSM  
LQSVSVPPSSFQSMHSVSQLOPPQLPRPPQPPQLLRPTVQALQQLQEQGMGLQSNVQVHQL  
QMLQQSQVPSMQTNYQTQQQQVEYTQQPGNCQSQQQQDAAMSLHEYFKSPEAIQSLLS  
DRDKLCQLEQHPKLMQMLQERLGQL

>Aqcoe1G078100.1

MGRPEPCVLFAQTFFVHPQLDEYVDEVLFGESIVITACEFLEQNASSASSVTVLGATSPPSF  
ALEVFVQCEGEPRFRRLCQPFYSHSSSNMLEVEAVVTNHLVVRGSYRSLTLVVYGNTAE  
DLGQFNIEFDLDSSLANLVCSPSEGKLEDLPALHSTKFSLEESLSIPKLLLLPVAEPDLSFEK  
EHFLQLIIKCFGASGNDDAMHKVASMVISAVSSYVTSDLGCTAITWNQCKQADLISCRKEL  
QSILNDAKNELNELHKILQHEVSSLPVDLLEEGVAVKSEAELATALAEHLDPVFSWYHLFK  
RICPSNGRTLSONKSMILGLSMVLFCLSGRETCFHFVNSSGMEQLVRVFHHETQKSAAVTL  
TLLGVIERATRYAIGCEGYLGWWPREDEIVPVGVSEGYSQLKLLKQKQGHGASVAAAYLL  
HRLRFYEVAARYESA VLSVLAGLSDVGEVTEGTLNMLDSAKSQLKNLSKMLNSRGPEDP  
SPVANAHRSVLVGQTDGLLSYRSTKLIASSNCCFSDFDIDSHLLSLLKERGFPLSAALLS  
SSNLRSEKGHITLDIFLDIASLVEAILLSLLFCRSGLVFLLLOPEVAAALVHSLKGVEDMNKE  
ECVPLRYASVLINKGFFCRSQDVGMITELHLRVVNAVDRLLASTPQSEELLWVLWELCGLS  
RSDSGWQALLVLGHFPEAVSVLMEALQSAKELEPTSLNSGSSPLNLAIFHSAAEIEFVIVSD  
STASSLGSWIEHSVELHKALHSSSPGSNRKDAPTRLLEWIDAGVVYQRNGAIGLLRYAAVL  
ASGGDAHLTSTSLVSDSMDVENVVGDSASGSDQVIDNLLGKLVSDKYFEGVTTLRDSSIA  
QLTTTFRILSFISENSSVAAALYDEGAVTLIYVILVNCKYMLERSSENTYDYLVEGAECNSM  
TDLLERGREQSLVDLMIPSLVLLITLLHKLQEAKEQHRNAKLLNALLRLHREVSPKLAAC  
AADLSSPYPGSALGLGAVCHLLVSALACWPVFGWTPDLFHCLLDSVQATSSSLALGPKEAC  
SLLCLLGDLPFEEGIWIWKNGMPSLSALKKLSIATLLGTQKEGHIDWYLQPEHVATLLSCL  
TPLLDKIAQIILHFASALVVIQDMLRVFIIRIAYQKPASAVILLRPIISWIHDHVSEPYSLSDT  
DVFVKVYRLDLFLASLLEHPYAKPLLVEGAVGILVKALGKCSSSFGLEGK VIAESRMRGSG  
FTLINWILPVLKSVILFCGSQSSLQQSDVLDSCGNLSVQDCSLILHLLSLCQVLPVGKELH  
ASLIAFKELAYCSEGRSAFASISTHLQSPNLDEFQLEGGHEEDGYDGVNTNSDWRRCPPLL  
YCWRNLLRSISGRECLSTYAIEAVGALS LGALCLCLEGKSLNLERIAVLKVLFVGPIDLDDD  
EQCPEESLKDFSELIGMLDTRVIDARHMSTSDMRATLSQVKELAKLLLLLQKPTTSIKVD  
DIICNGSFSLLSSDILDFPFTSVTTMSILDEDAGSLNSRIRKPDGSSERDEFFSFGSLADKFL  
WDCPDSL RDSMSALPSKRKMASMELPNRFSRVDNSGTESTGQNAFARGVGPPTVSTGPT  
RRDLFRQRKPNTSRPPSMHVDDYVARERNIDGASSGSNVVNSVQRGVTGGRPPSIHVDEF  
MARQRRERQGSVAMAGGEAAVPTRNVPENENDPKVD RSRQLKADLDDDLQEINIVFDD  
EESSEDDRLPFPQPDDNLQAPVVVDGSPPHSIVEETESDANGSTHVSDMGTPLTNSVDEN  
TQSEFSSRRSISRPEVRLSREASISSERKYFSSNTDRPFFRSKSDDAKHSGSVRASNGFDSAT  
ANFSGFPPPFYKGSPPSGQLVGDSRMSPSNFYQRDSPQHAPNIPSSSQGLYNQKFVPNQPL  
PPMPPPPNVSCVLSHSTENAQSHSSSYGHNIRD RQPPLPPGFPSQAFEGGGSITAPVYNVRE  
DRSTSHNYAAGSNPPSSSSSYVESLNDPSALQLQTDYYTSSAALLASQQGMFDPKYSWTS  
VSSASRSHDEINSSSSGLVRPPPLPPTPPPFASLTAQSSVKNSASQSPGYNQTNAGGNLTSY  
SPPQLVPPLLNSRPASIPVSLFSSPTIHQQGNL PGLSHSISTTQPSILSVQPRPQLQPLQPPQP  
HPHPPHLRPPNQGSQPEVALLQSPIQVQSHPFQMHQQSHLSPIQVYYPQQL ENLAHTQQ  
QQVERSOPQALQQGGNTPQQQQDAEMSLQQYFASPEAIQSLLSDREKLCQLEQNPKL  
MQMLQERLGQL

>Spov3.S03.00008

MRIKKIKINKKLFKKIKRKTLLKSTDFPVINSHGSLSFQERFPPLLLTAF AANTPARWL CGD  
ACYHTARLSEYLNMG RPEPCVLFAQTFFVHPQLDEYVDEV MF AEPIVISACEFLEQNAPSA  
SSAVTLLGATSPPSFALEV FVQCEGEARFRRLCQPFYSHSSSNVLEVEAVVTNHLVVRGSY  
RSLSLVYGNTAE DLGQFNVEFDLNSVAKLVSSSEAKLEDLPPLLHSRNP KFEDAISL K  
ALLSMLPAADISVQMRQFLQLIFKILDIPNRFGEFSQKVMALITSAVASFFTDDLASAGITLQ  
LNLGALANVKGSFHVFT EAQRNLFELCKRYVGAGHIYGDFLVGC SFLESEAE LATS KELV  
DMLFQHFPFN RDTVFVGH PHLKSNVLLWLSLALILCSGKESCFHYVNGGGMEQLAHF  
FSQEMLNSATVTLMLLGAMEQATRYSVGCEGLLGWWPREGEKVPSGVSEGY SLLLKLL  
MQKQRHDIAALTTYILHRLRFYEVASRYEYAVLSILGGLSGDGNATTTTSLLLKAKLQLR  
KLLKMINSSGWVEDPSPMACAIRSLMVASSEGSLSFKATSKLIASSSCRFLHQKIDAKLLSL

LKERGFLPLSVALISSTELRAERGHAEFLDLTSSIEATILSLMFCSRGLVFLQHPDLSSTII  
RAFKGDDNVTKFIPLRYAYVLVSKGFFCHLQEVGTNLEMHRLRVVHAVDRLLTSTPCSEELL  
VWLWELCGLSRSDGGRQALLALTHFPEAFTILIEALHSAKELEPISLSCGTPLNALIFHAAA  
EICEIIVTDPSTSSSVVWIDHATDLHRALHSSPSGNRKDAPSRLLEWIDAGVVYHKNGAV  
GLLRYAAVLAFFGGDAHITSTNILVSDSDHVEDVVGDTSNESDVNVVESLLGKLVSKDSFD  
GVALRDSSVAQLITAIRILALISENADVAASLFDEGAMTVVYIILVNTRLMLERSSNNYDYL  
VDDGIECSSTSDDLLEARNREKYLVDLLIPSLLLLIELLQRLKEAKEQHRNTKLMNVLLRLH  
RELSPKLAACSVDLSSSYDPSALGLETVCHLIVSALACWPAHAWAPGLFHTLLDSVQAAS  
LLALGPKETCSMLYLLIDLFPDEGVVHWKNGMPLLTASRSLAVGTLLGPLEERKVNWYL  
ERPCVEILLGQLSPHLDKIAQVIHHYAVGTLVVVQDILRILRIARQRTFATVLLQPMISWI  
ENHLIGTSPLDEIDAYKGYKLLDFLSLLEHPLAKTLLLKEGTLOILTQVLGRIDAHVKSVS  
NGRSSLNSRFNIYNCCLPVLRSLSLICETRSAQKLHLLLDGNETLSTEDSAVIFS YIFKLCQH  
LPAGNELVACLGTFKDLASTAIGQSTLLDTYLFIRSSSNENQPGRSQESYQFYNRLLIDAEW  
KGCPLLTWCWINLYGSVETEGTSTCSVEAIGLLSIGVLRFCMSGRRYPKKDLVKLVYPYDLF  
NEDRIDALKYFFGLSSDVGANGVLEENIKYVQDMCTLLSSKITDDEYAVSSHLKATLHQ  
AVESVKFLSLLLLKPIDSFKDDDAFTDEVLLFSSDAKLSSKIHLTLDSSSERVENELNFGELG  
ESFQWECPENLRNRLSQAGLLGKRKISAVDGVNRHGKGENAPVDVRGSGSSMAPPIPTRR  
DTFRQRKPNTSRPPSMHVDDYVARERNESSNPVIAVPRLGSSGGRPPSIHVDEFMARQRE  
RHNSVPIAGVEASSQGGKITLEIDNDTEKSNRSKQLKVDLDDDLQEIFDAEENEADDKL  
PFPQADDDVQQTASASAETSPQHSIVEETESAQKLEATVASNAVENAQSELSSRMSVSRP  
EMQLRREPSVSENKYEQPDETNNKNPTMVSGGFDVAVAKTSGFPASVYGKHSPPGAQ  
VPADARIPSSFPDNNLQRVGNVLLGRSQGRHEQKHLPNQPPLPPTPPPTISPVRSQVSEN  
QTSRSPFVNPHNDVQPPPLYPTYAQTDYQSSFGNVPTSFASSNFMSDSRYARTTNSSPGSSNR  
PLPPLPPTPPSFSATPLNVPSRSPTSQSSMYVQHNAGATDASQYSSPPLIPPGRSRLPSMPFN  
MHGNIPVQQSDNITGIAQNSRGPQPSMQSMQPLPHLQPLQPPQLPCPQQLRPLQNSLHTE  
QSGSMSQSHVQM QVQPPQILQQSQTSPTYHLYYQTSQENIPHPQQPQAAHHQVDAATQQ  
QMDSSMSLQQYFSSPEAIQSLLSDRDKLCQLLEQHPKLMQMLQDQLGHL  
>Soly03g020020.3.1

MGRPEPHVIYSHTFNHPQLDEYVDEVLF AEPPVVSSCEIVEQNAPSACSSLKIVGATSPPSF  
ALEVFVHCEGETRFRRLCQPFYSHSSSNVLEVEAIVTNHLVVRGSYRSLTLVYGNNTTED  
LGQFNIDVDLDGSLANTVSVVEGDLEDLPPALRPNNLSTEQTLSSLKSLSLKSIPLAVPEL  
RQLQLTLRMLESPEFGVMKNKVLTSLLSVASIYATPCFPSTTTMHEQLGLDKLVFNQEAQ  
FAIAEAKKELLEMYSNFIQPGDRSVEFSTDAMLVESEIEDAAPKQLLDSLHYFKFASPDP  
AASHREVSRENKREMYLCLSLALLVSSARESCYHFVNSGGMEQLDYAFKSLSLNPKHALGKIA  
LGVIEQATRHSVGCCEGLGWVWPREGENIPSGTSEYRNQLLKLLLLHNQRHDVASLATYILH  
RLRFYEVSSRYECSILSVLGGLSGSGQATSATLVDILTS AKNLLKNLLKLNSSGPIEDPSPVA  
CASKSLVLGDSGQLLYNSTSNLITQSSCCFSNNDMDQHLLSLLKERGFLPLSAALLSSSAL  
WSHAAC TIDLFVDILSYFEAIVLSLLSTRSGLIFLGRDPEVATIIIIHALRGADTWKKEESISLR  
HASVLISKGYFCHPRDVALIEMHLKAITADRILTSSPDS EDLLWTVWLQCLSRSDDCGRK  
ALLALVHFPEALSALIAILHSVKELDPVSPNSGAPPLNLAIFHSTAIEILEVIVSDSSASSLGS  
WIGHAKELHRVLHSSSPGSSKKDAPARLLDWIDASVVYHRSGAIGLLRYTAILASGGDAH  
MASTSVLASDGMVDVNVIGDSSCTDGNIIENMLGKRITERDFPGVVLRDSSIVQLTTAFRIL  
AFISDNSAVTAALYDEGAVMVIHAVLINCRMLERSSNIYDYLVDGTECNSTSDLLLERN  
REQTLDDLIPSLVLLINLLQKLKEAKEQHRNTKLLNALLQLHREVSPKLAACAADISYPY  
PSFALGFQAACDLLVSALACWPVYGWTPGLFNFLDSLHATSVLALGPKEICSLLCILNDL  
FAEEGVWLWENGTPTLSVLRLTAVRLLGPKKEKEINWFLQTGLREKLLGQLKPHLGKIA  
QIILCCSTSTLVVIQDMLRVFIIRIACIGGDNASVLLRPMVLWIGDRLSEKLPPSDLDAYKIQ  
RLLSFSLSLLEHAHGKRLFLKEGGLRMLIKALEMCLAAASSDAKQLAQKGFSLSWCVPV  
FKSITLLSECKTRQTPGIVERHVPEDMTAEENCLLLSLLLKFKCVLPVVGKELLSCLLVRLF  
WSSAKGKDALLSLYLHAKSSSIEEQESEKQFENGLNRDFS LDWKEHPPLLCCWESLLRTPA  
SKDDLPTYAVQGIGILSSGALSFCMDGESVNTERTAVKYFFGLENDNVAMDGLYEESIES  
VEEFVNLLKASDSSFLPVLDKISLDQIKESARSLMLLLHKPTGTVKADDIVMSNIHFPSPTY  
SKIHTIEDSGTERIEDYDLNEFGDKFSWECPENLRDLSLTQTSLTNKRKISSMEGPNRRIRGD  
SASTENAIPGAFSRGSVPTIVPSGPTRRDTRFRQRKPNTSRPPSMHVDDYVARERSADGSNN  
PNVIAVPRIGSTSGRPPSIHVDEFMARQRERQNP PGILVSDSAAAQEKAAIPEKQTD AEKSS  
KSHPMKSDPDDDLQGIDIVFDAEES EPDDKLPFPQPDNDLHQPAVVEEQNSPRSIVEETE  
GEVNETSQFSQRGTPVASNADENAQSEFSSRMSVSRPDLPLAREPSITSDRKFNDDQYEDMK  
NFHPKTSTMFASPAAAVSSGVGASAF TKASSSIQVAVDSRMPPNFYSRPTGQQSGVTPPNIG  
SQGYFDPKMQPPLPPTPPPVTMASLSQNADRILSQSSPFVSSMIDVQPHLPPGFHVQAEYL  
SAGASTPMTSSPLPDSKFGRTSLSSPGGPVRPLPPLPPTPPPYTISLSNLSSLTNLTSQTPVYN  
QSVGTNELQQTSNAHSSDVRSGNVSTSGPILTTYPPPLAPLLFNRHGVSVPVSFYGSSSAP  
YHNEKLPSISQHLPAIHSIPSVTQLQPLQPPQLPRPPQHVRPIVPASPQSEQSVPLLQSPMHM  
QMOSPQILHQPVSPAHVYYQTQQQENSLQQQQIEHSLSQVPQQQGDIVTQQQDSGMSL  
QDFFRSPQAIQSLLSDRDKLCQLLEQHPKLMQMLQDQLGHL  
>AH018923.RA

MGRPEPCVLFAQTFFVHPQLDEYVDEVIFAEPVITACEFLEQNASSALSTVALLGATSPPSFA  
LEV FVQCEGEARFRRLCQPFYSHSSSNVLEVEAVVTNHLVVRGSYRSLSLVYGNNTAED  
LGQFNVEFDL DNSVNVLVSSSEAKLEDLPPLLHRSRLKLEDSISSLKALSSVLPATDISLEMR  
RLQLAFKMLDIPNFGVFREKVLTIITSATASF TNDLNSSGITLQELNWGAVPDSKEPFLVF





KGFFCRPQEVGMITELHLKVGSAAANRLAVPPNSDELLWVLWELCAISRSDSGRQALLAL  
CYFPEAISVLLSSSYTDLDSTVTKTGGSPGLAIFHSAAEILEVLVADSTGSSSLKSWIGFA  
VDLHKALHSSSPGSNRKDAPTRLLEWIDAGVVYQRNGAVGLLRYSAILASGEDAHLSSGN  
VLVSESMDVENVADSNNSTDGQVIDNLLGKLVANKYFDGVALCSTS VVQLTTAFRILAFI  
SEDTA AASSLFEEGAIAVIYIVLMNCKSMLERLSNSYDYLVDGAELSSSTTELLLDRTHEQ  
ALVDLMTPSLVLLINLLHHIHTKEQYRNKLLTALLRLHREVSPRLAACASDLSFMFPSFA  
VSFGVVCQLITSALACWPLYNWTPGLFHCLLENVEPTNASVPLGPKDACSLCLLGDLP  
DEGVWLWTVVEVPSLSAIRLLSIGTVLGPQVEKQVNWYHLHPEHVALLVRLMPQLDRLSRV  
IDNFATSALMVIQDMLRIFIVRVASEKIECAVVLLRPIFTWLNSKVDETSLSEREVFKVHQLL  
KFIAKLAHEPNKGKLLWKMGVVS VLRKLLQNCNSASYLEDKMISDRGAYRNDLLVLKW  
RIPLFRCLASIFSSQASNERQTAVEESPNGNTTAEECSSIMHQLLVLCQVLPVGREMLACSM  
AFKEVASSICRSAPPLIFSQIKTANQDDKEINESDTYHGSSNTDDWRCFSPLLKCLKRLLK  
CIGANDPMDYYYVETVYSLMLGAIALSQYGDSLEGIIVLRCLFGYRFDGGTLESSGDNLNEI  
TVLLKTFEKIHQGHENFLSSVGKSLNQQVQSYITLLCSILKNSVLSSEDSVQMVLEGTYMP  
FGVRSVVMTSCLMPSLASESVNHESILFFSNAWKVIADSEEPTECLEDEFKRLVWELPD  
SSLERRMIPGQASRKLSLGDNTTRRIKENQAPEPTGQFTRGLSTTNASTGHTRRDTRFHR  
KPNTSRPPSMHVDDYVARERNIDGASSASNIVNSIPRGTLSGRPPSIHVDEFMARQKERQN  
PVPAPSGDAPQLKSQTSLLDDNVHAKSEKPRQPKAELDDDQEIIFDEESESDDKLPFPQPD  
DSLQSPPVIVGENSPGPVVEETENQQNEESPFSHRGTPVSKDNGSLGAGMSSRTVMLPEAI  
VPSEKRLPLSSPEKTVFNDQDPDEPAYVSSGSKRSAEAIVLQSHPNISQKRSAQKLSESSLSSG  
SHGHDHRLSKNQPLPMPPLPSSSMPVQNADSSQRRSSSYGVRDGPSPFPSSYPGQAFAN  
MPSDFVGLQAQTEHVLASNGGSSSNAPNADFNFLWNTFPVNRPLPMEHFSSGSSARLMPPL  
PPPYSPATQIAAMNSGSTASPYNQRSSVQPSSSSLMSDATLGMNSASGGAILSNSLPSF  
ASQFLIGRPSTCTSFSGTSPRQVQFSSGLSQNLNPNQPAVSSTHARPPPPPLPQQPHPSQTL  
QQLGSFQWQYQEQLSYPOSSIAQMPLQFPNQLSVPQMYYQSQHESAQQTLRQGGEQ  
SQLANQSIQADSLSQQRDSEINLNQFFSSPEAIQSLLSDRDKLCQLLEQNPKLMQMLQDR  
IGQL

>Sobic.001G191700.1

MGRPEPVVLFQAQTILHSQLEYYVDEVLFSEPVVITACEFLEQNASPSTPNISLIGATSPPSFAL  
EVFVHCDGESRFRRLCHPFLYSHSSSNVLEVEAIVTNHLVLRGTYRSLTLVIYGNTAEDLG  
QFNIELGLDHSVANNVSSPSEGKLEDLPALLSSKLSFEESLSSLKPLSFHATDV DLSIEAKK  
VLHLALKMYQMSDVENLIPNLSAVLSAISKYVTASTNHILHTSSQDSANSFTKSDFDSEI  
NNILAEAGNELSEIWKNVHAVTDSNLFNDNGFTIGGDEDLPTTKILIELFNQCFPYKNFSL  
LDLQCPSONKWLVLVSLVLLCCSSKESCFYFVDTGGMEQIINLLCWKTPKSAATLRIILLGI  
VEHATRNGFGCEAFLGWWPQTEHSSIRVASSNGYCSLLKLLLEKERHDIASLATYVLQRLR  
FYEILSKYESVVVKVISNLQADKVSTDGVPFLISASVELAEMLKLIICCGPIEDPSPVATARR  
LFKSEHLEGLLSYKATIDLISSSKYSFLQYDTPYLLSLIQERSFFPLSAALLSSPILHSASGP  
AAEILMGIASSIESLILSLLFCRSGLSFLLSQPEATELIVLSLQDAENMNKAECITLRQAFVLL  
SKGFFCRPKEVGMITELHLKVGSAAANRLSVPPNSDELLWVLWELCAISRSDSGRQALLAL  
GYFPEAISVLLRSLSSYKDLDSVMAKNGGSPGLAIFHSAAEILEVLVADSTGSSSLKSWIGF  
AVDLHKALHSSSPGSNRKDAPTRLLEWIDAGVVYQRNGARGLLRYSAILASGGDAHLSSG  
NVLVSDSMDVENVADSNSSSDGLVIDNLLGKLVADKYFDGVALCSTS VVQLTTAFRILAFI  
ISDDKAVASSLFEEGAITVIYIVLMNCKSMLERLSNSYDYLVDGAELSSSTTELLLDRTHEQ  
AIVDLMIPSLVLLINLLHILRETKEQYRNKLLSSLLQLHREVSPRLAACAADLSFMFPTFAI  
GFGVVCCHLITSALACWPLYNWAPGLFHCLLENIEATNASVPLGPKAAISLLCLLGDLPDE  
GIWVWKVELPSLSAIRSLSTGTVLGPQVEKDVNWYHLHPEHVAILLVRLMPQLDRLARIDN  
FATSALMVIQDMLRVFIVRVASEKIECAVVLLRPIFIWLDKVDKTSLSEREIFKVHQLLQFT  
VKLSEHPTGKVLLWRMEFTRILRKLLQNCSSSFSDDNQTFGRAPSKNDLMLKWRIPLFK  
SIACVFSIDTSNNEKAVIEESLNEKSVHECSSVMQHLVMFCQVLPVGREMLACSLAFKELA  
ASYTCRSVAVTLILSQIHTSNKDVLEKDESDPNHNLPTLDGWNCFSSLFNCWKKLAKYIGSN  
QPTDYLVTETIYSLTLGAILTSQYGENLEGLLILRYLFLGPSDPSGSLESSGESPEIELFMKTS  
EEKICQSFENSTTVDGKTLHKLNSITLLRSLSENSQSADSVQMVIEGTDLSLEIAHSV  
VMTADLMPSLANVSVKDESPFLFSNVWKVIVDSEEPDCQEGEFAKRLVWELPDSSSLDRQ  
LTPGQSARRKLALGESASRRVRDNQLPEPTGQFSRGLNTTNASSGHTRRDTRFRQRPNTS  
RPPSMHVDDYVARERNIDGASSASNIVNSTPRGTLSGRPPSIHVDEFMARQKERQNVPVAP  
TGDAPQPKSQTASLDGSLRTKPNLRQPKTDLDDDQEIIEIVFDEESGSDDKLPFPQPDSSL  
QSPPVIIGENSPGPVIETENQENERIPFSQRATSLPKDDESPGV DISSQTAMLSEPNNLSLEKY  
SVSSPGKNSFRDHAESNYPSIGVSGRSSVQADHQHLSRRHEKRSRKYSETSLSSGSHGH  
EHRHSNNHPPLPMPMPPISSVPMQNTDSANRQSSSFSAARDRPTPSLSGYPTQSFDSMPMPAF  
TGLQGQTQYMLAGAGGSSANDLPNAEAKLLWNTFPVNRIPLETFSSGLSARPMPLTPYS  
AVATQHAPMSSSPATLYNQGSVQPSPTASIISSDNLAMNSNLLPSFASQFLMGRPSMPTPF  
FGTPLQQVQFSSGLPQNISNSQPSVSSVQPRPPPPPPPPPPQPHPSQTLQQLGAIQLPHQDQQ  
LPYPQSAIPQVPLQFPNQLPIPQLQLYHQSSQQESGQTLRQVGEQSQLQNGMQADSFQ  
QQQDSGINLNQFFSSPEAIQSLLSDREKLCQLLEQNPKLMQMLQDRIGQL

>ZmPHB47.05G080000.1

MGRPEPVVLFQAQTILHSQLEYYVDEVLFSEPVVITACEFLEQNASPSTPNISLVGATSPPSFA  
LEMVHCDGESRFRRLCHPFLYSHSSSNVLEVEAIVTNHLVLRGTYRSLTLVIYGNTAEDL  
GQFNIELGLDHSANVSSPSEGKLEDLPALHSSKLSFEESLSSLKPSFHFATDV DLSIEAK  
KVLHLALKMYQISDVENLIPNLSAVLSAISKYVTASTNHILHTLSQDSANAFINSDFDSQE

INKILAEAGKELSEIWKNVHAVTESNLFNDNGFTIGVDEDLPTTKILIELFNHCFPYKCLS  
LLDLQCPSQSKWLVLSSLVLLLCSSKESCFYFVDTGGMEEQIINLLCWRTPKSAATTLLLG  
RVEHATIRNGFGCEAFLGWWPRAEHTSIPVGGSSDGYCSLLKLLLEKERHDIASLATYVLQRL  
IFYEILSKYESAVVKVISNIQADKLDSTDGVPFLLASVELGEMLKLIIFCGPIEDPSPVATASRI  
FKSEHLEGLLSYKATIDLITSSKYSFLQYDTPYLLSLIQERSFFPLSAALLSSPILHLPNGPA  
AEILMGIASSIESIILSLLFCRSGLSFLLSQPEATELILLSLQDAEKMKNKSECITLRQAFVLLSK  
GFFCRPKEVGLITELHLKVGSAAATRLSVPPNSDELLWVLWELCAISRSDSGRQALLALGY  
FPEAISVLLRSLSSYKDLDSVMAENGGSPGLAIFHSAAEILEVLVVDSTASSLESWIGFAV  
DLHKALHSSSPGNSNRKDAPTRLLEWIDAGVVYQRNGARGLLRYSAILASGGDAHLSSGN  
VLVSDSMDVENNVADSNSRDGQVIDNLLGKLVADKYFDGVALCSTSVVQLTTAFRILAFIS  
DDKPVASSLFEEGAITVIYVVLNMCKSMLERLSNSYDYLVDGAELSSTTELLLDRTHEKA  
IVDLMIPSLVLLINLLHILRETKEQYRNKLLSSLLQLHREVSPRLAACAADLSFMFPTFAIG  
FGVVCHLITSALACWPLYNWAPGLFHCLLENTEATNASVPLGPKAAFSLLCCLGDLFPDE  
GIWLWKVELPSLSAIRSLSTGAVLGPQVEKGVNWYHPEHVTILLVRLMPQLDRLARIIDN  
FATSVLMVIQDMLRVFIVRVALEKIECAVVLLRPIFMWLDDKVDKTSLSERDTFKVHQLLQ  
FTVKLSEHPTGKALLWRMGFTRILSKLLQNCSTRASFYDNDQTFGRAHKNLMLKWRPIL  
FKSIAYIFSIDPCNNEKADVEESLNEKSVHECSSVMHDLMMFCQVLPVGREMLACSLAFK  
ELVYSYTCRSATVTLILSQIHTSNKDVLEKDESDPNHNSPSLDGWNCFSLSFKCWKKLVKY  
VGSNERTDYLVTIYSLTLGAILTSQYGENLEGLLILRYLFGLPSPDPSGSLESSGESPEIELF  
MKTYEEKICQGIENSATAVGKTLRLKLLNSIKLLRSILENSGQSADTVQMVLEEGTDSLSEI  
ARSVVMTAHLMPSLANVSVNDESPFLFSNMWVIVDSEPLDCQEGEFAKRLVWELPDSS  
LDRQLAPGQSARRKLALGESASRRVRDNQLPEPTGQFSRGLNTSNASSGHTRRDTRFRQR  
PNTSRPPSMHVDDYVARERNIDGASSASNIVNSTPRGTLSGRPPSIHVDEFMARQRERQNH  
APAPTGDAPQAKSQTTSLDDSLRTKPENLRQPKTDLDDDQEIIEVFDEESGSDDKLPFPQP  
DDSLQSPPIIGENSPGPVIDETENQENERVPFFQATSIKDDENLGIGISSQTAMLSEANSS  
LELKHSVSSPGKNSFRDHAEESNYDSIGVSGRPSLQADHQQLSRRHEKRSRPFSETSLSN  
GFHGREHRHSNNHPPLPPMPPPISSVSMQNTDSVNRQSSSFSARDRPTPNPSGYPTQSFDS  
MPSAFTGLQGQTQYMLAGAGSSANELPNVEAKLLWNTFPANRIPLETFSSGLPARPMPPL  
TPYSAVATQHATMNSGSPANLYSQGSVVQPSPTASIIISDSNLAMNSASGSMLASNLPSFAS  
QFLMSRPSMPTPFPGTLPQQVQFSSGLPQNISNPQPPVSIQPRPPPPPPPPQPHPSQTLQQL  
GAIQLPHQDQQHSYPHSAILPQVTLQFPNQLPIPVQVLYHQSQQESGQTLRQVGEQSQLQN  
QGMQADSFSQQQQDSGINLNQFFSSPEAIQSLLSDREKLCQLLEQNPKLMQMLQDRIGQL  
>OsKitaake03g230201.1  
MGRPEPVVLFQAQTILHSQLEDEYVDEVLFSEPVVITACEFLEQNASPSTPNISLVGATSPPSFA  
LEVHVHCDGESRFRRLCQPFYSHSSSNVLEVEAIVTNHLVLRGTYSRLTLVIYGNTAEDLG  
QFNIELDLHSLANVVSSPSEGKLEDLPPALHSSSKFTFEESLSSLKPLSLQATELDLSIEVKKI  
LLLALTMYPQIPNVENLIPNLQSAVISAVLKYPASTNCMSRNWNRPANCFADNVDSQG  
TSNTLLMEASNELFDIWKNVNSIVDNITFDDNGLAFRLEELPTTKHLFTLFDSCFPYRNC  
SLDLECPFQSKRLVFSLSLVLLLCSSKESCFYFVDAGGMEQIINLLCWKTSISPATTLVLG  
VIDNFATRYVVGCEAFLGWWPSSDDNNIPIGSSVGYCSLLKLLLEKERHDIACLATYVLQRL  
RFYEILSRYESAVVNIVSNLPSEELSSDGVNLFSSASIELAELLKMINMCPVIEDPSPVLTARR  
ICKFGHLEGLLSYNLTIGLITSSKYSFLQFDADPYMLSLIQERGFFPLSAALLSSPVRLASG  
PAAEILMEIASSIEALVLSLLFCRSGLSFLLGQPEATELILLSLQDGEDMSKTECMTLRQAFV  
LLSKGFFCRPQEVAMITELHLKVGSAAANRLAVPPNSDELLWVLWELCSISRSDSGRQALL  
TLGFFPEAVSVLLSSLSSYNLDLDSVTNKNNGGSPLGHAIFHSTAIEILEVLVADSTASSLKSWIG  
FAIDLHKALHSSSPGNSNRKDAPTRLLEWIDAGVVYKRNAGVGLLRYSAILASGGDAHLSS  
GNVLVSDSMDVENNVADPNNTDGQVIDNLLGKLVADKYFDGVALCSTSVVQLTTAFRILA  
FISEEKAVASSLFEEGAINVIYVVLNMCKSMLERLSNSYDYLVDGAELSSTTELLLDRTHE  
QTLVDLMIPSLVLLINLLHILNETKEQYRNKLLTALLQLHREVSPRLAACAADLSFMFPSPF  
AVSFGVVCHLVTSIAICWPLYNWAPGLFHCLLENVEATNAAVPLGPKDACSLCCLGDLF  
PDEGIWLWKVEVPSLTAIRSLSTGTVLGCQVEKHMNWYHPEHVSILLVRLMPQLDRLAC  
VIDNFATRYVVGCEAFLGWWPSSDDNNIPIGSSVGYCSLLKLLLEKERHDIACLATYVLQRL  
QFIAKLSEHPNGKALLCKMGVARILRKLLQECSSMCYMEDNMISDKGVYSNDLLMLRWK  
IPLLRSIASIFSTRPSSKEPTTVEELWNENACVEECSSIMYHLLMLCQVLPVGRDMFACSLA  
FKEVASSYSCRGAVTISFSIQTSNKDESQKSESETCHDTSKVDNWCGFFPLLKCWKRLQ  
YICANRPTDYLVEIVYALTGAIALSQSGQNLEGTIILRRLFGHPSVPSSSEASDEVTFLLKT  
FQEKICQGFNDWSPYVGKPLLHQVRSSVRLCSIENS GPFTDSVRMVLEESTIPVGVFHN  
VMTSHLMPSIDFVSVNDDPALLFTNAWKAFGDFAEPFGCQVSDFSKRMVWELPDCSIDKQ  
LIPSQSARRKLALGDSASRRVRDNQTHEPSGQFSRGLNTPSASIGHTRRDTRFRQRKPNTSRP  
PSMHVDDYVARERNIEGASSASNIVSSTPRGALSGRPPSIHVDEFMARQRERQNPVLAPSG  
DATQVRSKATLDDNVSTKPEKPRQPKADLDDDQEIIEVFDEESGSDDKLPFPQPDDSLQSP  
VIIGENSPGPVVIDETENQQNGINLFSGTVVSSEDEACETVISSQTAIRQESNIPSERKFSVSSP  
EKMFPDHADESFPISPTTGLKVIPGYSTHAAQATLRQLPPNMHRKRSPHKLAESSVSSGS  
HGHDRTLNYSQPPLPPMPPPVSSVSLQNPDSIAQRPQSSYIARDGPPPPPPPPSYLMQSFDCMP  
SFVGHQVQVTENVLPSTGDSSSNALPSVDAKFLWSTLPVNRIPEHLSSGSSTRPVSPPLRP  
VLATQHAAMDSGPPGSLYNQGGSGVLQPSPPASLINDATLGTNPASGGALASNSLPSLASQ  
YIIGRPSTPPFFGTPLQIQLSSGLAQSVSNPQPSLSSMQPRAPPPPPPPQPHPSQTFQGSLLQPPQ  
EQPMPYPLNTIQPVPLQFPNQLHVPQLQFYHQTQESVLQPIGQSAQQQMDSGMNLNHHF  
SSPEAIQSLLSDRDKLCKLLEQNPKLMQMLQDRIGQL

>OsVIR

MGRPEPVVLFQAQTILHSQQLDEYVDEVLFSEPVVITACEFLEQNASPSTPNISLVGATSPPSFA  
LEV FVHCDGESRFRRLCQPFYSHSSSNVLEVEAIVTNHLVLRGTYSRLTLVYIGNTAEDLG  
QFNIEVDLDNSLTNNVVCSPSEGRLEDLPLALHSSSELA FEESVSSLKSLGFRSPEFDILPEVKQ  
FLLAFQICQLVD TNDMASNVVS AVESVASSCAVNTDSALHSWDQELLSALVGSKRDSP  
KFLNVLADARNELLEIWKNLQSENGSCELMEDELETQLPTTEMLVDMFYQCFPFRRKAST  
LDLPFFSQSKNLVFALGLILLVCSREGCSHFVSGGMDQIIHLLHREIPKSTATTL LLLLLIIIE  
CATRHGIGCESFLGWWRDFVVPFRVSDGYCYLLELLEKQRDDIASLSTYVHLRHRFFE  
ILSRYESAVVFLLTNLPADGQLATDGVTSLYDANSQKHLERGFPLSAALLSSATLSASG  
SAADSLSFLLVQPEATELLILAFQDGEDISKTECMTLRQATVLLSKGFFCRPQEVGMIIELYL  
RVVTAVSRLLAAAPNSDEFLWALWELCAISRTDTGRKALLALGYFPEALSVLLEALRSYK  
DLEQTAITSENVFGDSTSSSDGLVIDNLLGKLVSDKYFDGVPLTSTISVQLTTALRILAYISED  
SAVAATLFEEGAVTLVYVVLVNCKSMLEWNSYDYLVDEGAESSSTTDLLFGRSHEKRL  
LDLIIPSETKEQYRNKLLNALLQLHREVSPALGHGAICHLITSAVASWPFGWAPGLFHS  
LLENIQATSSAALGPKDVCSSL SLLGYLFPDEGIWLWKNEMPPLSAVRALSIATVLGPQVE  
RQINWYLLPEHSSLLLRTPQLDKIAQVVLHYATSGLVVIQDMLRVLIARIASQRAECAVV  
LLRPTISWLDNHVDESSLSDTDIFKVHQLLHFIALSLEHPNSTALLSKMGTVRILGKVLEIC  
SNAFYSEGKLTRESRGPNQELEQDERD TDENYSNEYSWLQSLPFLKCWKKLLRSLDSNDS  
CANFVVETVYVLSLSAVCLSLEGDSVEGINILKYFLGPLCEPGGAADISDEKLNEVVNLLK  
TLEGNIAENENSTAIVGKSALDHVKCYHVKESLKAVSLLHSTSDLSNSQLAVCTESLET  
SNAIRSIVMTSQLMPSLSTLPLNEEAALFFSNAWKFIGDSEKTSNDFPNGEFLEKFVWECS  
SSLGKHLLPAQSAKRRLPPGDGSSKRTRDAAGSEATTSNVFSRGNVNAQNAPLGPTRRDTF  
RQRKPNTSRPPSMHVDDYVARERNIDGASSGNIVNTNQRGGSISGRPPSIHVDEFMARQR  
ERQNSIPTLAAGDASQPKSSDLLNNNGPPKPDQPQKL RADLDDDEIDIVFDEEPGSDDKLP  
FPQPEENLPSPTVAVVKSSPGSVVEESEGDRNGNVRFNQIGSTPQASRSQISTTQELSVPSEK  
NTSLRDRSESNYSSQPSTNIAGFSPFSNARSSAPLPLQQFSSSYLYQGKSPQKEQTLGNAQ  
PPLPPTPPAAVVSPPFVNTSRDVQPPLPTGYPLQAFDVGGPNNVAGLQLSEENMLSTGNG  
SWNSITGSRMHLPLPLPPPYSNPITHSPALHSGSPASLYNPSTSNVGTTLTPTPSLISDTGLGI  
LPASGNNNLSAYS LPPFTPSLLINRPNSLPGSVFSPQQGQIPSNLSHILPNSQPSSIQRPPPPPP  
PPPPQLPHPSQTPQQATPIQMPQPHAEQAMPFAQSSVQLQVPLQFQQQLHVPQMIFYPT  
QQLESVLPQPSQPAVEHQPPQNQGLQVDSLSSQQQK DAGISLQQYFSSPEAIQSLLSDREKL  
CQLLEQHPKLMQMLQERLGQI

>Aco001714.1

MGRPEPVVLFQAQTILHSQQLDEYVDEVIFAEPVVITACEFLEQNASPSTPSISLIGATSPPSFAL  
EVFVHCEGESRFRRLCQPFYSHSSSNVLEVEAIVTNHLVLRGSYRSLTLVYIGNTAEDLG  
QFNIEVDLDNSLTNNVVCSPSEGRLEDLPLALHSSSELA FEESVSSLKSLGFRSPEFDILPEVKQ  
FLLAFQICQLVD TNDMASNVVS AVESVASSCAVNTDSALHSWDQELLSALVGSKRDSP  
KFLNVLADARNELLEIWKNLQSENGSCELMEDELETQLPTTEMLVDMFYQCFPFRRKAST  
LDLPFFSQSKNLVFALGLILLVCSREGCSHFVSGGMDQIIHLLHREIPKSTATTL LLLLLIIIE  
CATRHGIGCESFLGWWRDFVVPFRVSDGYCYLLELLEKQRDDIASLSTYVHLRHRFFE  
ILSRYESAVVFLLTNLPADGQLATDGVTSLYDANSQKHLERGFPLSAALLSSATLSASG  
SAADSLSFLLVQPEATELLILAFQDGEDISKTECMTLRQATVLLSKGFFCRPQEVGMIIELYL  
RVVTAVSRLLAAAPNSDEFLWALWELCAISRTDTGRKALLALGYFPEALSVLLEALRSYK  
DLEQTAITSENVFGDSTSSSDGLVIDNLLGKLVSDKYFDGVPLTSTISVQLTTALRILAYISED  
SAVAATLFEEGAVTLVYVVLVNCKSMLEWNSYDYLVDEGAESSSTTDLLFGRSHEKRL  
LDLIIPSETKEQYRNKLLNALLQLHREVSPALGHGAICHLITSAVASWPFGWAPGLFHS  
LLENIQATSSAALGPKDVCSSL SLLGYLFPDEGIWLWKNEMPPLSAVRALSIATVLGPQVE  
RQINWYLLPEHSSLLLRTPQLDKIAQVVLHYATSGLVVIQDMLRVLIARIASQRAECAVV  
LLRPTISWLDNHVDESSLSDTDIFKVHQLLHFIALSLEHPNSTALLSKMGTVRILGKVLEIC  
SNAFYSEGKLTRESRGPNQELEQDERD TDENYSNEYSWLQSLPFLKCWKKLLRSLDSNDS  
CANFVVETVYVLSLSAVCLSLEGDSVEGINILKYFLGPLCEPGGAADISDEKLNEVVNLLK  
TLEGNIAENENSTAIVGKSALDHVKCYHVKESLKAVSLLHSTSDLSNSQLAVCTESLET  
SNAIRSIVMTSQLMPSLSTLPLNEEAALFFSNAWKFIGDSEKTSNDFPNGEFLEKFVWECS  
SSLGKHLLPAQSAKRRLPPGDGSSKRTRDAAGSEATTSNVFSRGNVNAQNAPLGPTRRDTF  
RQRKPNTSRPPSMHVDDYVARERNIDGASSGNIVNTNQRGGSISGRPPSIHVDEFMARQR  
ERQNSIPTLAAGDASQPKSSDLLNNNGPPKPDQPQKL RADLDDDEIDIVFDEEPGSDDKLP  
FPQPEENLPSPTVAVVKSSPGSVVEESEGDRNGNVRFNQIGSTPQASRSQISTTQELSVPSEK  
NTSLRDRSESNYSSQPSTNIAGFSPFSNARSSAPLPLQQFSSSYLYQGKSPQKEQTLGNAQ  
PPLPPTPPAAVVSPPFVNTSRDVQPPLPTGYPLQAFDVGGPNNVAGLQLSEENMLSTGNG  
SWNSITGSRMHLPLPLPPPYSNPITHSPALHSGSPASLYNPSTSNVGTTLTPTPSLISDTGLGI  
LPASGNNNLSAYS LPPFTPSLLINRPNSLPGSVFSPQQGQIPSNLSHILPNSQPSSIQRPPPPPP  
PPPPQLPHPSQTPQQATPIQMPQPHAEQAMPFAQSSVQLQVPLQFQQQLHVPQMIFYPT  
QQLESVLPQPSQPAVEHQPPQNQGLQVDSLSSQQQK DAGISLQQYFSSPEAIQSLLSDREKL  
CQLLEQHPKLMQMLQERLGQI

>Pp3c22\_17700V3.1

MAALPRCSLLFADSFHHDRLCQHVDEVRFTEPVVITACEVVVELHQPSRCPTLALKGITSPE  
SCALEFVYVRSGRDSRFQRLGPAFLHSPAIPFLDVQAAVTEHLVLRGYSKSLTLVIYGNLAS  
ELCVDNNPMTNNVSQRATSKIVSLREILCTQPSILSLSNLQLYTPPTKEQGTLLQRLIKYVD  
GRDATQHMVSMMLTAAAWHLHQREGAQWCALKKKDDPLDGRSLLCDDSIREMSE  
LHNLLQKEGDDKHTSSDEANGRVLVQLSLHWLQVGLDPSAGLNSSISAVESLLGGLAAV  
QLLFTSCPKDVPFLAGGGMRLHQQVVEEISGTSALLLFALTSVECTLRHASGCEEFSAQD  
KRILLSLLEKKQRPVVSLLQRLQRLRCYELAVTITRLVEPLTNLGSQAQNSDTIKEASKLLN  
GLLIALSIKSFVESTSVEYNWVKQEAKLPTSAGSCYDDFTSLSEDVDCALLSILQETSFMES  
LAAFSSVPHIWPANGSAPNVSIEFASATQRFLLRLLECRSGLLFLGADMESLTKMITGLKSA  
SEQELEVLPIRHVTVLSSLGYLCTPGSMAETLHSRISMVSAADRFVGADAGSDAAFGALW  
DLASMSRSEAGRQAILAIVSFPEVLTALIEAIHPSPDLAESMGGAGGHFATEALQKVFCDSA  
LVNQIALTVHASALQALQAACNSGMNSCSKLVEWVEAAVVYQKKGAVGLLKHATALIG  
PLNTSMTIHVDGSMGDDANNLHDRAMGSELPSISKGTGSTPIQYSAIHALTISLRLLASAG  
WNLEVAASLYGDGAVGVVNIIEHCVAALQASSNEFDDDETEDEGRGEDFHKQALLAL  
LLPTLILLLSLLKCLQSVVQHFCSTRLLDLLTLQHHLHVISAKAGAHETAPPYSWTGEVLELQ  
AVQQVLASLLAFWPVQGWTPALMPRLFGSNSTSLPMEPTEACSVICLLEEFPPPECPRTFM  
DKAAVLDVYRTVAVGNIHGVEVMPAVYWHTSPKHTDKMLHVLSPFLEQIGQLVVHLASC  
TCDVVQERLTNLVVRLACQSSNAVIVLRPVLSVLRQRTAAAKSLLSETDVLQVTHMLR  
WIALLTAAHASSKALLLQEGIVQMLLQVISLEATPSIPVGKSGWLMWSLRTVARLCDTEVCF  
LPAASVARHISEDPCPNYDDCCAIASSLLQHCQLMHVEPQIEVLADAFEKLASHDVGRAAV  
ASVALGHAGCATHMNNHDTPEQSISGVFHKASPPFLKLWQNLVSAMGLVELNPVLVRLVR  
RFAQVAIVLTESGHSSVGGVALRALFGLDVSSSESTESKTVGERDDKLEAPSCVVSILQQHLT  
DIEDSNATFSVFRSSLHEALS AVSSMLNYLTASEKEIVLREEIELLINRLPAARPVAERRAEAI  
VAQSSSCFGLVSFMDGDKPMDTDISEAINGESKGTIPWDCPKLPHERPVMKMRTSKRRVI  
STIEVASKRQRGDGATS AVASRTPVLVTSSRRDTRFLRKPNTSRPPSMHVDDYVAREKSSD  
VLSGSSPAAAATTLQRSNSGTRRAPSIHVDEFMARQRENQQSDIPLIQGYAENGGSRAVLD  
LLDGDNGADLCLTDRNLRSQTTAEYSSSVIVSSVATFSAAPPALAMMNTSVINSEVLQR  
NPNFHSASEHTGFSSQRLGGMKMEQNNGGTCPGVEINSQPPSSVVKVLERAPSMNSVS  
AGLPSPFQPYEQEFNA AVAAAVKMEPRQQPDSNIMPRTLHAEVPAAPPQQQASQSDLSSHL  
PPPPPPAPPSPWLDQPRRLDPSLLPPVIPRLIPGMNVLPYNHGSGSRPPADLQVGGVVLQPP  
AGLWRDSTPVFSGLPPPAPPPIPGPNPHGPQFVQQSFMGASRPLDTLQGYPGNHAGTASTSD  
HRFGNLSGPPSGQGSSPLFQPPIPTGMPPSQNTLSSEQSVHRPPPLHLQESEIIAQQEPGAVL  
QQILQSPDTIHELLKDTKKLQQLLEQHPKLVALLEQEKISHGML

>Ptrif.0006s1372.2

MGRPEPCVLFAQTFVHPQLDEYVDEVLF AEPIVITACEFLEQNASSTSQAVSLVGATSPPSF  
ALEV FVQCEGETRFRRLCQPFYLSHSSSNVLEVEAVVTNHLVVRGSYRSLSLIYGNTAEDL  
GQFNIDFDDSSSLTDLVTS AEGKLEDLPLALHSINRTIEESLSSKVLVSLPVAPSDISIEVKQLL  
HMLKLVPFSLNPESAVHKTSTVTVLAASSFVAHDLGDTTRQKHLASGKLKSNEDDLQHA  
VIKARKELIQLYAALQHDSGND SAELLGDCAFFETeadvasskelvdmLSQYFNFSGNSTS  
LGHHNLPQNKSVILGLSVALLCSGREGCFHFVDSGGMDQLAYVFSRDIENTAIMLLVLG  
AIEQATRHSIGCEGFLGWWPREDIESIPSGISEGYRLLNLLVQKPRHDVASLATFVLHRLRY  
YEVASRYESA VLSVLGGLPAAGKVTAATSNMLISAKS QLK KLLKLINLRGPIEDPSPVSSAR  
RSLTLVQAEGLLSYKVTSNLIASSTCGFSNSDIDPHLLTLLKERGFLLS AALLSSSILRTEV  
GDAMDVYLDIASSIGAILL SLLFCHSGLVFLHHY EISATLIHALRGVTDLNKEECVPLRYAY  
VLMSKGFTCGLQEVATIVEMHLRVVNAIDRLLTSTPQSEEFLLVWLWELCGVSRSDCGRQA  
LLTLGFFPEAVSMLIEALHSAKEQEPSTKSGGASPLSLAILHSAAEIFEIIVTDSTASSLGSWI  
GRAMELHKALHSSSPGSNRKDAPTRLLEWIDPGVVYHKSGVIGLLRYAAVLASGGDAHLS  
STSNLVSDLMEVENATGEPSSGSDFNVMENLVKIISEKSF DGVTLRDSSIAQLTTALRILAFI  
SENSAVAAALYEEGAVTVVYITLVNCRFM LERSNNYDYLIDDGTECNSSSDDLERNREQ  
CLVDLLVPSLVFLITILQKLQEGNEQHKN TKLMNALLRLHREVSPKLAACAADLSSPYPN  
ALSFGAVCRLVVSALAFWPIYGWTPALFHSLLVSVQTTSLALGPKETCSLLCCLNDFPPEE  
DIWLWRNGMPSLSALRTLAVGSLLGPQKEREVEWYLEPGRREKLLTQLRPHLDKIAQIIRH  
YAISALIVIQDMLRVLIIRVASQKSENASLLRPILAWIRDHVS DSSSPSDMDVYKVHRLLD  
LASLLEHPCAKAVLLKEGVPQMLIEVLKRCFEATDSDGKQFSDQLNSVKIGSTLT SWCLPV  
FKSFSLLCCSQTPMQHPGSHDLYKFDNLSADDCSLILPHILKFCQVLPVGKELVFCLTAFRE  
LVSGGEGQRALISIICTHSTLEEFDSGRGHESNDDRSLLNEFEWRKNPPLLCCWTKLLNS  
VDSNDGLSTYAVEAVCALSLGSLRFCLDGKSLNSNAIVALKYLFGLPDDKSGTESFPEENV  
KLIQKMFTVLSKINDDNYYSAIPDLQTS LQCQVLEFVKVLLLLLQKPTGSVDVDNVMFTEGI  
LPSPNDIVLSNIHQMVGGNVEKDDDKLYLVGLEDKFMWECPETLPERLSQTALPAKRKMP  
PVEGLSRRARGENSA AETNQNFTSRGLGPTTAPSGPTKRDSFRQRKPNTSRAPSLHVDDYI  
AKERSGEGVSNV VIIAQRVGSAGGRAPSVHVDEFMARERERQKRMVTVVGEATQVKN  
EAPTS GTQKEKVDKPKQLKTD PDDDLQGIIDFDEESEPDDKLFPQLDDNLLQQAPVIV  
EQSSPHSIVEETESDVNESGQFSHMSTPLASNADENAQSEFSSMMSVSRPDVPLTREPSVSS  
DKKFFEQSDDSKNVITAKASGVFD SGAAANSPGFSASLYNNATGSSMPTDSRMNQNFYPK  
NSPQHAANLPVGTGSRGLYDQKVM PNQPLPPMPPPQAISP GMSQASDSIPSHSSPYVNSL  
TEVQMSVPPGFVQADYLSAFSGSSTPGGSSRPPLPPTPPPFSSSPYNLPSFKANSQMSMY  
NQNIGGTTDLPAQASSIVPMIDARLGVSASAAAGVSYPPPHIMPLVFNRPASIPATLYGNTP

AQQQGEIMQNLSIPOSSIQSMHSLAPLOPLQPPQVPRPQQPPQHRLRPPMQASQQLEQVTSL  
QNPVQMQVHPLQTMQPPQVSPHITYYQSQQQEFSPAQQQQQVVERTQPQVQHHQGDIGSQ  
QQQDPAMSLHEYFKSPEAIQSLSDREKLCQLLEQHPKLMQMLQERLGH

>DmVIR

MADVDDGSELLFFDTFSHEEVDINLDLVQFPKPVFITQVRIIPLGARVQADFPGGVRLGAT  
NPSKFDLEFFVNDLGMPAASAFENLGLLRYNQNDCHLDCSQEKIVTDGLVLRGWYSTITL  
AIYGIFTNSVTEPIASPTLPCEPVGPEIANLSGEVLLQEDVLKDEWQEPMQAELLTAHKG  
VSDYDPEDMEYGMSSRDHYHQHAEQEQREMRRLRRSTHSTDHSPPPRRSHTHSESNDR  
EYIRCSRDKGSRDWSRSPEYSSHRSRKRKRSERSRSVDEHKWPRTPPASIDSPTRPRSPDT  
MDYEDEDSSRSHYKMQSSHYRHSSESLHRGERDRDDEDRSCTPQEQFEPILSDDEIIGDDEE  
DDAVDAAAIAEYERELEAAAAAAPPDAFEPWQKPLLVEFGDMAAHFCKELETLLKLLFK  
KLVLTQTRCENVNAFSEEHGASVDEREQFVYLGEQLNNQLGYLAQHYKRRNFVLQOFFGN  
DELHLRQAANVLQIALSFQAACMQPQPAFKIRHIKLGARMAELLSSEELFQHLLKEHKF  
DIFEAVFRLYHEPYMALSIKLLQKAVYALLDTRMGIEHFMGAKNNGYQMIVEAIKTAKLT  
RTKYALQAIKKLHLWEGLESVQIWCRRFLVDRIIPGNRDQMEDTVITCQQIEFAFEMLMD  
ALFSSQLSYLQPRRFLPVSKKFEVVTDPQTAQRSFGNALQSYLGQNSLAESLLVMLANCKE  
LPATTYLSMLDLMHTLLRSHVGIDYFVDDAFPVTQTIVAILLGLDEVPRNPKEEKEEKAES  
DAEDKAMEVENEAVEAGGEKTPPTADEEGKPAAPISVPAPAAAPQVRPRPILRPVLPRL  
ARLGIEMSYKVQTRYHLDAIYAAAAPEYDAVKLATHMHAIYSQTCDPAGRQHTVEVLG  
LNNNLKIFMDLIKKEQRLQTRQQLSSPGTKYKSPVLSYAVDMVDACVRYCEQLDYLIEHG  
GVILELAKNHETFEPSVSAVLQEMYVYMKPLEAINVFVYDDIMPLVEVIGRSLDYLTTFPG  
DLIMAMRILRYLSISKPLAGQKAPPVTEELKHRFVALQLYAADGVQLCQIMERLCAYFEQ  
PGAHAAPALMTIQGVHCCQIMLPTLQILRELLSYAILCRDGTQKDLTAIDHLVKVYYLLYYF  
TRCQAGPEVEQCKMEVVQTLAYTQPNQDEESLHKSLSWTLMIREV LKNVDGPAHFIPGL  
KLLAELLPLPLPMPQPLCDQLQQQHKQRLITERKLWSAHLHPQSGQIAKLVEALAPSSFPQ  
LSELLQVRVCMQLSDLAPNMTLLIAKTITELLCEYQTSNCIPTTNLERLLRFSTRLCAPL  
KSSMLSILSGKFWELFQSLALNEFNVDVSNQCEAVHRILDSFLDSGISLISHKSTASPALNL  
AAALPPKELIPRIIDAVFSNLTSEVETHGISLAVRNVLILTEHDFTFYHLAQLLKQKITEFQA  
WMERVILHNETVEYNANIESLILLRSLTQIEPPPAMSAMPHRTLKLGATELAQLVEFQDIE  
LAKPPVLSRILTVMEKHKAVANEAAALSDLKQILLLQASKQEILAGTSTETPPEAEGEANPSA  
SSCSASLTVEPYLPQAEIVTQYEAARPIFTRFCATAENAQLTARYWLDPLPIELIEDMNEPIY  
ERIACDLTDLANVCLNPDLNVAGDSKRVMNLSGSPQSNREMTPTAPCFRTRRVEVEPATGR  
PEKMFVSSVRGRGFARPPPSRGDLFRSRPNTSRPPSLHVDDFLALETGCAQPTGPTGYN  
KIPSMRLGSRVGRNRGRISAAAARQKKMMRIGSPSSWAESPGSYRSASDSHFSSSDSHY  
SSPHYSGRPRGRGLRSRPSYLR

>HsVIR

MAVDSAMELLFLDTFKHPSAEQSSHIDVVRFPCCVVYINEVRVIPPGVRAHSSLPDNRAYGE  
TSPHTFQLDLFFNNVSKPSAPVFDRLGSLEYDENTSIIIFRPNKSVNTDGLVLRGWYNCLTL  
AIYGSVDRVISHDRDSPPPPPPPPPPPQPPSLKRNPKHADGEKEDQFNGSPPRPQPRGPRTP  
PGPPPPDDDEDDPVPLPVSGDKEEDAPHREDYFEPISPDNRNSVPQEQYSDGEVEVEEQE  
EGEEDEDDVDVEEEDEDEDEDDRRRTVDSIPEEEEEDEEEEGEEDDEEGDDGYEQISSDEG  
IADLERETFKYPNFDVEYTAEDLASVPPMTYDPYDRELVPLLYFSCPYKTTFEIEISRMKDQ  
GPDKENSAGIEASVKLTELLDLYREDRGAKWVTALEEIPSLIHKGLSYLQLKNTKQDSLQ  
LVDWTMQUALNLQVALRQPIALNVRQLKAGTKLVSSLAECGAQGVGTGLLQAGVISGLFEL  
LFADHVSSSLKLNFAKALDSVISMTEGMEAFLRGRQNEKSGYQKLELILLDQTVRVVTA  
GSAILQKCHFYEVLSEIKRLGDHLAEKTSSLPNHSEPDHDTDAGLERTNPEYENEVEASMD  
MDLLESSNISEGEIERLINLLEEVFHLMETAPHTMIQQPVKSFPTMARITGPPERDDPYPVLF  
RYLHSHHFLELVTLLSIPVTSAPGVQLQATKDVLFKFLAQSQKGLFFMSEYEATNLLIRAL  
CHFVDQDEEEGLQSDGVDDAFALWLQDSTQTLQCITELFSHFQRCCTASEETHSDLLGTL  
HNLYLITFNPVGRSAVGHVFSLEKNLQSLITLMEYYSKEALGDSKSKKSVAYNYACILILVV  
VQSSSDVQMLEQHAASLLKCKADENNAKLQELGKWLEPLKNLRFINCIPNLIEYVKQN  
IDNLMTPPEGVGLTTALRVLCNVACPPPPVEGQQKDLKWNLAQVQLFSAEGMDTFIRVLQKL  
NSILTQPWRLHVNMGTTLHRVTTISMARCTLTLLKTMLTELLRGGSFEEKDMRVPSALVTL  
HMLLCSIPLSGRLDSEQKIQNDIIDILLTFTQGVNEKLTISEETLANNTWSLMLKEVLSSIL  
KVPEGFFSGLILLSELLPLPLPMQTTQVIEPHDISVALNTRKLWSMHLHVQAKLLQEIVRSF  
SGTTCQPIQHMLRRICVQLCDLASPTALLIMRTVLDLIVEDLQSTSEDKEKQYTSQTTRLLA  
LLDALASHKACKLAILHLINGTIKGDERYAEIFQDLLALVRSPGDSVIRQQCVEYVTSILQS  
LCDQDIALILPSSSEGSISELEQLSNSLPNKELMTSICDCLLATLANSESSYNCLLTCVRTMM  
FLAEHDYGLFHLKSSLRKNSSALHSLKRVVSTFSKDTGELASSFLEFMRQILNSDTIGCCG  
DDNGLMEVEGAHTSRTMSINAAELKQLLOSKEESPENLFLELEKLVLEHSKDDDNLDL  
DSVVGLKQMLESSGDPLPLSDQDVEPVLSAPESLQNLFNNTAYVLADVMDDQLKSMWF  
TPFQAEIIDTDLVLKVDLIELSEKCCSDFDLHSELERSFLSEPSSPGRTKTTKGFKLGKHK  
HETFITSSGKSEYIEPAKRAHVPPPPRGRGGFGQGIKPHDIFRQRKQNTSRPPSMHVVDDF  
VAATESKEVPQDGIPPPKRPLKVSQKISSRGGFGSGNRGGRGAFHSQNRFFTPPASKGNYSR  
REGTRGSSWSAQNTPRGNYNESRGGQSNFNRGPLPLRPLSSTGYRPSPRDRASRGRGGL  
GPSWASANSAGSGSRGKFVSGSGRGRHVRSFTR
