# Supplementary material for: Cotton (Gossypium hirsutum) VIRMA as an N6-Methyladenosine RNA Methylation Regulator Participates in Controlling Chloroplast-Dependent and Independent Leaf Development
Source: MDPI journal article supplement (doi:10.3390/ijms23179887), 2022-08-31
Supplement: s1 [file s1]

**Table S2.** List of primers of this study used for different experiments.

| Gene symbol | Gene name      | Primers (5'-3')                   | Purpose    |
|-------------|----------------|-----------------------------------|------------|
| Gh_A11G2095 | GhaTUB6 RT-F   | ATCTGTGGCCGAGGTTTCTC              | qRT-PCR    |
| Gh_D11G2411 | GhaTUB6 RT-R   | CTAGTAATCTTCTGGTTCTTC             | qRT-PCR    |
| Gh_A05G3802 | GhbTUB6 RT-F   | GTCTCTGACACCGTTGTGGAG             | qRT-PCR    |
| Gh_D05G1777 | GhbTUB6 RT-R   | CTTAGGCAGCATGTTACACCG             | qRT-PCR    |
| Gh_A12G0052 | GhGID1B RT-F   | CGATTGGATGGGAAGTATTTTG            | qRT-PCR    |
| Gh_D12G0066 | GhGID1B RT-R   | TTGCCAATCTTGAATGAGGTC             | qRT-PCR    |
| Gh_A02G0358 | GhEIN2 RT-F    | GCATGTTCTACTTGTCTGATGA            | qRT-PCR    |
| Gh_D02G0417 | GhEIN2 RT-R    | CTACGGCTTCGGAACCTTACAG            | qRT-PCR    |
| Gh_A07G0914 | GhPTAC16 RT-F  | TGAGGAGAAGCCTAAAGTCCA             | qRT-PCR    |
| Gh_D07G0989 | GhPTAC16 RT-R  | CAAACACCTTCCTCACTTCTG             | qRT-PCR    |
| Gh_A10G0408 | GhmTERF1 RT-F  | ACCTCTAACATCAAAGCTGAG             | qRT-PCR    |
| Gh_A10G0408 | GhmTERF1 RT-R  | GCAAGACAGGGTCTTGATAAG             | qRT-PCR    |
| Gh_A11G2019 | GhSIG1 RT-F    | CTCACCATAGTTACATTGCAG             | qRT-PCR    |
| Gh_D11G2299 | GhSIG1 RT-R    | CCTATGCGTTTACTGATGTCC             | qRT-PCR    |
| Gh_A08G0093 | GhRPL12-A RT-F | GTTTCGATGTGGTGATTGAGGA            | qRT-PCR    |
| Gh_D08G0135 | GhRPL12-A RT-R | CTAAGCAATGGAACTTTAGC              | qRT-PCR    |
| Gh_A02G0768 | GhRPS13 RT-F   | GAGCTCATTACGATTTCGTGAT            | qRT-PCR    |
| Gh_D02G0814 | GhRPS13 RT-R   | CAGCAATGGCAACTCTCTTAC             | qRT-PCR    |
| Gh_A01G0976 | GhPSI RT-F     | GTCCACTGCTAAATCCACTTG             | qRT-PCR    |
| Gh_D01G1028 | GhPSI RT-R     | CTTGACAAAAGATGCCTAGCAT            | qRT-PCR    |
| Gh_A04G0428 | GhPSII RT-F    | GGTGTTTACCAATATGTTGACA            | qRT-PCR    |
| Gh_D05G3193 | GhPSII RT-R    | CAAAGCACTTGTATTGTAAACA            | qRT-PCR    |
| Gh_A02G0402 | Gh50S RT-F     | GAACAAAGCCAACAAAGTTTCG            | qRT-PCR    |
| Gh_D02G0455 | Gh50S RT-R     | TCATTTCCTTGCGAAGATCTATC           | qRT-PCR    |
| Gh_A06G0106 | Gh30S RT-F     | GACATTGGGGTATGAAACGAG             | qRT-PCR    |
| Gh_D06G0079 | Gh30S RT-R     | CTGTGGAGCTTTACGAGCCTT             | qRT-PCR    |
| Gh_A01G0414 | GhTCP3 RT-F    | GTTTCGTGCTTGATAGACCAG             | qRT-PCR    |
| Gh_D01G0419 | GhTCP3 RT-R    | GCTTATTGGCAATGCTGTCGTG            | qRT-PCR    |
| Gh_A13G1272 | GhTCP10 RT-F   | TCAGAGGGGACCCCTTCAGTC             | qRT-PCR    |
| Gh_D13G1576 | GhTCP10 RT-R   | GAAGCAGAGGACAGCTTATTTG            | qRT-PCR    |
| Gh_A01G0139 | GhGLK1 RT-F    | GGACCCCGAAATTTTGGTTGAA            | qRT-PCR    |
| Gh_D01G0183 | GhGLK1 RT-R    | CATCGCCTTTACTCGTCGAA              | qRT-PCR    |
| Gh_A12G1283 | GhGCN1 RT-R    | TTTCCGCTATGTACCCGTC               | qRT-PCR    |
| Gh_D12G1405 | GhGCN1 RT-F    | TGTTACACGTTTGGGGTGGT              | qRT-PCR    |
| Gh_A03G0593 | GhPNSB4 RT-F   | TGTTCACTTGCTGGGGATGT              | qRT-PCR    |
| Gh_D03G0881 | GhPNSB4 RT-R   | AATCAGCTCTTCACGCCACA              | qRT-PCR    |
| Gh_A08G1679 | GhPSBW RT-F    | CCAACAATGGCGAAGAAAGGG             | qRT-PCR    |
| Gh_D08G2029 | GhPSBW RT-R    | AGCTGGTGAGCTTGACATGA              | qRT-PCR    |
| Gh_A11G3190 | GhPSAN RT-F    | CTTCCCCAGTTATGTGCGGT              | qRT-PCR    |
| Gh_D11G2278 | GhPSAN RT-R    | AGCTGCCAAGTAGAGCACAG              | qRT-PCR    |
| Gh_A12G1042 | GhGIF3 RT-F    | AGCAACCTGGCATGTACCCTC             | qRT-PCR    |
| Gh_D12G1162 | GhGIF3 RT-R    | GCCTGATTCCCATTTGACCTT             | qRT-PCR    |
| Gh_A11G0749 | GhGRF9 RT-F    | AAAAGATGGCGATGCAGCAGG             | qRT-PCR    |
| Gh_D11G0870 | GhGRF9 RT-R    | TGGACGGCAATCACCAACACT             | qRT-PCR    |
| Gh_A07G2353 | GhARF19 RT-F   | CTCGTACAGAGCCAACAGCA              | qRT-PCR    |
| Gh_D07G0132 | GhARF19 RT-R   | GAGACTGCGACAGTGATCCA              | qRT-PCR    |
| EU604080    | GhUBI1 RT-F    | CTGAATCTTCGTTTCACGTTATC           | qRT-PCR    |
| EU604080    | GhUBI1 RT-R    | GGGATGCAAATCTTCGTGAAAAC           | qRT-PCR    |
| Gh_A04G1327 | GhVIR RT-F     | ATTTATCTTCGGTTAGTGGC              | qRT-PCR    |
| Gh_D04G0886 | GhVIR RT-R     | GACGAGCATCAATAGTAGGTC             | qRT-PCR    |
| Gh_D04G0886 | GhVIR EcoRI-F  | CCGGAATTCGAAGCTTTGCATTCTGTCAAG    | VIGS-TRV   |
| Gh_D04G0886 | GhVIR BamHI-R  | CGCGGATCCGGACTTCATAGAGATAATGCT    | VIGS-TRV   |
| Gh_D04G0886 | GhVIR PacI-F   | GGGTTAATTAAGTTTGTATTGAAGCTTTGCATT | VIGS-CLCrV |
| Gh_D04G0886 | GhVIR AvrII-R  | CTTCCTAGGGTCAGCTGGGCTATAGAAGAGT   | VIGS-CLCrV |
